# Supplementary material for: Predicting sleep disordered breathing in outpatients with suspected OSA
Source: PubMed Central journal article supplement — BMJ Open. 2014 Apr 15;4(4):e004519. doi: 10.1136/bmjopen-2013-004519 (PMC4010842; doi:10.1136/bmjopen-2013-004519), 2014-04-15
Supplement: bmjopen-2013-004519.draft_revisions.pdf [file bmjopen-2013-004519.draft_revisions.pdf]

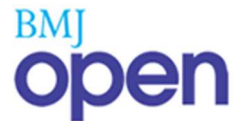

**Predicting sleep disordered breathing in outpatients with suspected OSA**

|                                 |                                                                                                                                                                                                                                                                                                                                                                                                                                                                                                                                                                                                                                                                                                                                                                                       |
|---------------------------------|---------------------------------------------------------------------------------------------------------------------------------------------------------------------------------------------------------------------------------------------------------------------------------------------------------------------------------------------------------------------------------------------------------------------------------------------------------------------------------------------------------------------------------------------------------------------------------------------------------------------------------------------------------------------------------------------------------------------------------------------------------------------------------------|
| Journal:                        | <i>BMJ Open</i>                                                                                                                                                                                                                                                                                                                                                                                                                                                                                                                                                                                                                                                                                                                                                                       |
| Manuscript ID:                  | bmjopen-2013-004519                                                                                                                                                                                                                                                                                                                                                                                                                                                                                                                                                                                                                                                                                                                                                                   |
| Article Type:                   | Research                                                                                                                                                                                                                                                                                                                                                                                                                                                                                                                                                                                                                                                                                                                                                                              |
| Date Submitted by the Author:   | 20-Nov-2013                                                                                                                                                                                                                                                                                                                                                                                                                                                                                                                                                                                                                                                                                                                                                                           |
| Complete List of Authors:       | Cowan, Douglas; Glasgow Royal Infirmary, North Glasgow Sleep Service, Respiratory Department<br>Allardice, Gwen; University of Glasgow, West of Scotland Cancer Surveillance Unit<br>MacFarlane, Duncan; Gartnavel General Hospital, North Glasgow Sleep Service, Respiratory Department<br>Ramsay, Darren; Gartnavel General Hospital, North Glasgow Sleep Service, Respiratory Department<br>Ambler, Heather; Gartnavel General Hospital, North Glasgow Sleep Service, Respiratory Department<br>Banham, Stephen; Gartnavel General Hospital, North Glasgow Sleep Service, Respiratory Department<br>Livingston, Eric; Glasgow Royal Infirmary, North Glasgow Sleep Service, Respiratory Department<br>Carlin, Christopher; Gartnavel General Hospital, Sleep and Breathing Support |
| <b>Primary Subject Heading</b>: | Respiratory medicine                                                                                                                                                                                                                                                                                                                                                                                                                                                                                                                                                                                                                                                                                                                                                                  |
| Secondary Subject Heading:      | Respiratory medicine                                                                                                                                                                                                                                                                                                                                                                                                                                                                                                                                                                                                                                                                                                                                                                  |
| Keywords:                       | Sleep medicine < ANAESTHETICS, SLEEP MEDICINE, Adult thoracic medicine < THORACIC MEDICINE                                                                                                                                                                                                                                                                                                                                                                                                                                                                                                                                                                                                                                                                                            |
|                                 |                                                                                                                                                                                                                                                                                                                                                                                                                                                                                                                                                                                                                                                                                                                                                                                       |

SCHOLARONE™  
Manuscripts

1  
2  
3 **Predicting sleep disordered breathing in outpatients with**  
4  
5  
6 **suspected OSA**  
7  
8  
9

10  
11 **<sup>1</sup>Douglas C. Cowan BMedSci, MBChB, MRCP, PhD; <sup>2</sup>Gwen Allardice BSc,**  
12  
13 **MSc, PhD; <sup>1</sup>Duncan MacFarlane BSc; <sup>1</sup>Darren Ramsay BSc; <sup>1</sup>Heather**  
14 **Ambler; <sup>1</sup>Stephen Banham MBChB, MD, FRCP; <sup>1</sup>Eric Livingston BSc,**  
15 **MBChB, MD, FRCP; <sup>1</sup>Christopher Carlin BSc, MBChB, MRCP, PhD.**  
16  
17  
18  
19  
20  
21  
22  
23

24 **<sup>1</sup>North Glasgow Sleep Service, Gartnavel General Hospital and Glasgow Royal**  
25 **Infirmery, Glasgow, UK;**  
26  
27  
28

29 **<sup>2</sup>West of Scotland Cancer Surveillance Unit, University of Glasgow, Glasgow,**  
30 **UK.**  
31  
32  
33  
34  
35  
36  
37

38 ***Address for correspondence:***

39 Dr Douglas C Cowan,  
40 Respiratory Department,  
41 Glasgow Royal Infirmery,  
42 16 Alexander Parade.  
43  
44 Glasgow,  
45  
46 UK,  
47  
48 G31 2ER  
49  
50  
51  
52  
53  
54  
55

56 Tel: +44 141 211 3482  
57  
58  
59  
60

1  
2  
3 e-mail: [douglas.cowan@otago.ac.nz](mailto:douglas.cowan@otago.ac.nz)  
4

5 The Corresponding Author has the right to grant on behalf of all authors and does grant on behalf of all authors, an exclusive  
6 licence (or non-exclusive for government employees) on a worldwide basis to the BMJ Publishing Group Ltd and its  
7 Licensees to permit this article (if accepted) to be published in Thorax and any other BMJPGJL products to exploit all  
8 subsidiary rights, as set out in our licence  
9

10  
11 **Running title:** Prediction of Sleep Disordered Breathing  
12

13  
14 **Word count:** 2997  
15

16 **Key words:** Obstructive Sleep Apnoea, Sleep Disordered Breathing, Berlin Questionnaire,  
17 STOP-BANG questionnaire, prediction  
18  
19  
20  
21  
22  
23  
24  
25  
26  
27  
28  
29  
30  
31  
32  
33  
34  
35  
36  
37  
38  
39  
40  
41  
42  
43  
44  
45  
46  
47  
48  
49  
50  
51  
52  
53  
54  
55  
56  
57  
58  
59  
60

**Abstract**

**Background:** Validated predictors of sleep disordered breathing (SDB) are required to streamline sleep services in the face of the obesity epidemic. Berlin, STOP and STOP-BANG questionnaires are useful in other settings, but their ability to predict obstructive sleep apnoea (OSA) in the sleep clinic population is unknown. We considered the utility of these questionnaires, other patient characteristics, co-morbidities, Epworth Sleepiness Scale (ESS), exhaled nitric oxide (F<sub>E</sub>NO) and blood markers for the prediction of SDB on limited polygraphy.

**Methods:** Data was obtained on 129 patients referred with possible OSA. We selected cut-points of apnoea hypopnoea index (AHI) of  $\geq 5$  and  $\geq 15$  per hour from their home polygraphy and determined associations of these with individual symptoms, questionnaire scores and other results. ROC analysis, univariate and multivariate logistic regression were used to explore these.

**Results:** AHI was  $\geq 5$  in 97 and  $\geq 15$  in 56 patients. STOP and STOP-BANG scores were associated with both AHI cut-points but results with ESS and Berlin Questionnaire scores were negative. STOP-BANG had a negative predictive value 1.00 (0.77-1.00) for an AHI  $\geq 15$  with a score  $\geq 3$  predicting AHI  $\geq 5$  with sensitivity 0.93 (95%CI 0.84-0.98) and accuracy 79%, whilst a score  $\geq 6$  predicted AHI  $\geq 15$  with specificity 0.78 (0.65-0.88) and accuracy 72%. Neck circumference  $\geq 17$ in and presence of witnessed apnoeas were independent predictors of SDB.

**Conclusions:** Both STOP and STOP-BANG questionnaires have utility for the prediction of SDB in the sleep clinic population. Modification of the STOP-BANG questionnaire merits further study in this and other patient groups.

(Word count 246)

1  
2  
3  
4  
5 Strengths and limitations of this study:  
6

7 Strengths:  
8

- 9  
10 • This is the first study to prospectively evaluate the utility of the Berlin, STOP and  
11 STOP-BANG questionnaires in the prediction of sleep disordered breathing in the  
12 population referred to a sleep service for assessment of possible obstructive sleep  
13 apnoea.  
14  
15 • This results of this study show that the STOP and STOP-BANG, but not the Berlin  
16 questionnaire, have utility for prediction of sleep disordered breathing in the sleep  
17 clinic population.  
18  
19  
20  
21  
22  
23  
24

25 Weaknesses:  
26

- 27  
28 • This study uses home unattended limited sleep studies rather than in-hospital attended  
29 full polysomnography, however this is considered standard clinical practice in the UK  
30 and is considered an acceptable method for diagnosis of OSA by the American  
31 Academy of Sleep Medicine.  
32  
33 • The sample size limits the conclusions that can be drawn from the multivariate  
34 analysis, however this was a secondary objective of the study.  
35  
36  
37  
38  
39  
40  
41  
42  
43  
44  
45  
46  
47  
48  
49  
50  
51  
52  
53  
54  
55  
56  
57  
58  
59  
60

## Introduction

Obstructive sleep apnoea syndrome (OSAS) is common with prevalence of approximately 4% in middle-aged men and 2% in middle-aged women.(1) Frequent partial (hypopnoea) or complete (apnoea) upper airway collapse during sleep leads to oxygen desaturation, increased respiratory effort, arousal and sleep fragmentation.(2) Patients typically present with witnessed apnoeas, loud snoring and excessive daytime somnolence.(3) The syndrome is associated with impaired quality of life,(4) cognitive functioning and work performance,(5) and with increased risk of road traffic accidents.(6) OSAS is considered an independent risk factor for hypertension,(7) and has associations with coronary disease, stroke, heart failure, arrhythmias,(8) metabolic syndrome(9) and type 2 diabetes.(10)

Despite the substantial burden of this disease, it is under-recognised. One study estimated that 93% of females and 82% of males with moderate-severe OSAS were not clinically diagnosed,(11) and more recent data support this finding.(12) Sleep studies are required for OSAS diagnosis but are expensive and not widely available.(3) Given the recent increases in childhood(13) and adulthood obesity,(14) the workload for sleep clinics and sleep laboratories will increase. Predictors of sleep disordered breathing (SDB) are required to allow recognition of OSAS, and prioritisation of investigations.

Several questionnaires have been designed to screen for SDB in different populations. The Berlin Questionnaire was first validated in primary care against portable unattended sleep studies and a “high risk” score predicted a respiratory disturbance index >5 with sensitivity 0.86, specificity 0.77, positive predictive value 0.89 and likelihood ratio 3.79.(15) It’s utilisation in other populations has been assessed with variable success.(16-22) The STOP and STOP-BANG Questionnaires were originally validated in surgical patients using in-

1  
2  
3 hospital attended polysomnography.(23) For prediction of apnoea hypopnoea index (AHI)  
4  
5 greater than 5, 15 and 30, sensitivities for the STOP and STOP-BANG questionnaires were  
6  
7 65.6, 74.3 and 79.5%, and 83.9, 92.9 and 100%, respectively. The Berlin and STOP  
8  
9 questionnaires have been compared in a cohort of surgical patients(24) and the STOP and  
10  
11 STOP-BANG questionnaires have been compared in a large study involving several distinct  
12  
13 cardiovascular and respiratory disease cohorts.(25) No study has, however, compared these  
14  
15 screening tools in a sleep service-referred population. Also, along with changes in the  
16  
17 population (i.e. rising obesity rates) there is increasing recognition in primary care, so it is  
18  
19 necessary to update and re-evaluate established assessment tools in the face of the evolution  
20  
21 in sleep clinic practice.  
22  
23  
24  
25  
26

27 The objective of this study was, firstly, to compare utility of Berlin, STOP and STOP-BANG  
28  
29 questionnaires for prediction of SDB in a population referred to the sleep clinic for  
30  
31 assessment of possible OSA. Secondly, we sought to identify the most important variables  
32  
33 from these questionnaires and routine sleep clinic assessment that might be utilised in the  
34  
35 development of a composite predictive score for future use in this population.  
36  
37  
38  
39

#### 40 **Methods**

41  
42 This was a prospective observational study conducted May-December 2012. The protocol  
43  
44 was approved by the West of Scotland Research Ethics Committee. Study participants  
45  
46 received an information sheet and provided informed consent. .  
47  
48  
49

#### 50 *Participants*

51  
52 Consecutive patients aged  $\geq 16$  years referred to the North Glasgow Sleep Service (a tertiary  
53  
54 centre) for assessment of possible OSA were invited to participate.  
55  
56  
57  
58  
59  
60

### *Measurements*

Height, weight, body mass index (BMI), neck circumference, blood pressure and Epworth Sleepiness Scale (ESS)(26) were completed at the Sleep Clinic. Participants attended the Sleep Laboratory on a separate day so that a Sleep Physiologist could provide, and instruct on fitting, a sleep study device. On that occasion, relevant symptoms and co-morbidities were recorded, Mallampatti score was assessed, and the Berlin and STOP-BANG Questionnaires were completed. Blood samples including non-fasting lipid profile, glycated haemoglobin (HbA1c) and C-reactive protein (CRP) were taken. Two fractional exhaled nitric oxide (F<sub>E</sub>NO) measurements were taken using the NIOX MINO<sup>®</sup> (Aerocrine, Solna, Sweden), and the mean calculated.

### *Sleep Studies*

Unattended home limited polygraphy sleep studies were performed using the SOMNOmedics SOMNOscreen<sup>™</sup> kit (Randersacker, Germany) with channels that recorded body position, thoraco-abdominal movements, oronasal airflow, heart rate, pulse oximetry and snoring. Sleep studies scoring by experienced Sleep Physiologists was in accordance with accepted guidelines.(27) An apnoea was defined as cessation of nasal flow for  $\geq 10$  seconds, whilst a hypnoea was defined as 50% reduction in nasal flow for  $\geq 10$  seconds, or lesser reduction in flow associated with oxygen desaturation of  $\geq 4\%$ .

### *The Epworth Sleepiness Scale (ESS), Berlin, STOP and STOP-BANG Questionnaires*

The ESS is a validated measure of daytime sleepiness including eight questions, each with four possible responses, that assesses the likelihood of dozing in different situations; a score of  $\geq 11/24$  denotes excessive daytime somnolence.(26) The Berlin Questionnaire includes



1  
2  
3 questions in three categories that relate firstly to snoring and witnessed apnoeas, secondly, to  
4  
5 tiredness, fatigue and sleepiness, and thirdly, to hypertension and obesity.(15) High risk of  
6  
7 OSA is defined by scoring positively in  $\geq 2$  categories. The STOP Questionnaire includes  
8  
9 four yes/no questions that relate to Snoring, Tiredness, Observed apnoeas and high blood  
10  
11 Pressure.(23) High risk of OSA is defined as a score of  $\geq 2$ . The STOP-BANG Questionnaire  
12  
13 includes four additional questions relating to BMI, Age, Neck circumference and Gender, and  
14  
15 high risk of OSA is defined as a score of  $\geq 3$ .(23)  
16  
17  
18  
19

### 20 21 *Statistical analyses*

22  
23 Statistical analyses were carried out using GraphPad Prism 5, IBM SPSS Statistics 19 and  
24  
25 STATA 12. Normality of data was checked using D'Agostino & Pearson omnibus normality  
26  
27 test. A priori, two cut-points were chosen for AHI:  $\geq 5$  events/hour (the standard cut-point  
28  
29 for the diagnosis of OSA),(28) and  $\geq 15$  events/hour, to predict significant SDB (the standard  
30  
31 cut-point for initiating continuous positive airway pressure [CPAP] therapy).(28) Groups  
32  
33 were compared using unpaired t-tests, Mann-Whitney tests and Fisher's Exact tests as  
34  
35 appropriate. Sensitivities, specificities, positive and negative predictive values, positive and  
36  
37 negative likelihood ratios, and overall accuracies were calculated for each of the  
38  
39 questionnaires for prediction of SDB as defined by AHI cut-points of  $\geq 5$  and  $\geq 15$ .  
40  
41 Associations between individual variables and each of the cut-points for AHI were explored  
42  
43 using univariate and multivariate logistic regression. For multivariate analysis, in a few cases  
44  
45 where BMI was known but neck circumference was not known, a value for the neck  
46  
47 circumference was imputed using linear regression with BMI as the independent value. This  
48  
49 allowed for a dataset of 116 cases with all of the variables known or imputed to be built to  
50  
51 identify independent variables for inclusion in a composite score. Receiver operating  
52  
53 characteristic (ROC) curve analysis was used to assess predictive value and an area under the  
54  
55  
56  
57  
58  
59  
60

1  
2  
3 curve (AUC)  $>0.7$  was considered clinically significant. Data are presented as mean  
4 (standard deviation), median (interquartile range) and proportion (percentage), unless stated  
5 otherwise. A p value  $<0.05$  was considered statistically significant.  
6  
7  
8  
9

## 10 11 12 **Results**

13  
14 150 subjects participated in this study, of which 129 had adequate sleep study data and were  
15 included in the analysis. AHI was  $\geq 5$  in 97/129 (75%) and  $\geq 15$  in 56/129 (43%). Overall, 82  
16 (64%) were male, mean(SD) age was 49(11) years, and median(IQR) BMI was 32(29-39)  
17 kg/m<sup>2</sup>.  
18  
19  
20  
21  
22  
23  
24

### 25 *Predicting SDB: Patient characteristics (See Table 1)*

26  
27 An AHI  $<5$  (“rule-out measurement”) was associated with female sex, younger age, lower  
28 weight and neck circumference, less frequently reported witnessed apnoeas, higher high  
29 density lipoprotein (HDL) cholesterol, and lower triglycerides, cholesterol/HDL and HbA1c.  
30  
31 An AHI  $\geq 15$  (“rule-in measurement”) was associated with male sex, obesity, higher weight,  
32 BMI and neck circumference, more frequently reported hypertension and witnessed apnoeas,  
33 lower HDL cholesterol, and higher triglycerides, cholesterol/HDL and HbA1c.  
34  
35  
36  
37  
38  
39  
40  
41  
42

### 43 *Predicting SDB: ESS, Berlin, STOP and STOP-BANG (See Tables 2, 3 and 4)*

44  
45 The ESS and Berlin questionnaire outcomes were not associated with either AHI cut-point.  
46  
47 An AHI $<5$  was associated with lower STOP and STOP-BANG scores, and fewer subjects  
48 being classified as “high risk” for OSA by both STOP and STOP-BANG questionnaires. An  
49 AHI $\geq 15$  was associated with higher STOP and STOP-BANG scores and more subjects being  
50 classified as “high risk” for OSA by the STOP-BANG questionnaire but not by the STOP  
51  
52  
53  
54  
55  
56  
57  
58  
59  
60  
questionnaire.

1  
2  
3  
4  
5 For the AHI cut-point of  $\geq 5$ , the Berlin, STOP, and STOP-BANG questionnaires had high  
6 sensitivities, moderate positive predictive values (PPV) and poor specificities and negative  
7 predictive values (NPV), for prediction of SDB. The STOP-BANG questionnaire performed  
8 best with an overall accuracy of 79%. For the AHI cut-point of  $\geq 15$ , the Berlin questionnaire  
9 had high sensitivity, but otherwise performed poorly. The STOP and STOP-BANG  
10 questionnaires had high sensitivities and NPVs. Again, the STOP-BANG questionnaire  
11 performed best, but with a low overall accuracy of 56%. The low negative likelihood ratios  
12 for the STOP and STOP-BANG questionnaires at both cut-points indicate that these  
13 questionnaires have value in excluding disease. As shown in table 4, the cut-points for  
14 STOP-BANG score that were associated with best overall accuracy were  $\geq 3$  and  $\geq 6$  for  
15 prediction of AHI  $\geq 5$  and  $\geq 15$ , respectively.  
16  
17  
18  
19  
20  
21  
22  
23  
24  
25  
26  
27  
28  
29  
30  
31

32 *SDB versus no SDB: Predictors and a composite score (See Tables 5 and 6 and Figure 1)*

33  
34 For the cut-point of AHI of  $\geq 5$ , univariate logistic regression showed significant associations  
35 for age, gender, weight, neck circumference, witnessed apnoeas, triglycerides and  
36 cholesterol/HDL ( $p < 0.05$ ). For the cut-point of  $\geq 15$ , significant associations were found for  
37 gender, weight, BMI, neck circumference, witnessed apnoeas, obesity, hypertension, FeNO  
38 and cholesterol/HDL ( $p < 0.05$ ). Multivariate logistic regression based on the significant  
39 variables from univariate logistic regression showed that for both cut-points neck  
40 circumference and witnessed apnoeas were independent predictors of SDB. For the cut-point  
41 of AHI of  $\geq 5$ , in a model incorporating neck circumference and witnessed apnoeas, the  
42 probability of SDB was 0.94 for individuals with neck circumference  $\geq 17$  in and witnessed  
43 apnoeas (sensitivity 84%, overall accuracy 77%, ROC AUC 0.768,  $p < 0.001$ ). For the cut-  
44 point of AHI  $\geq 15$ , the probability of SDB was 0.69 for individuals with neck circumference  
45  
46  
47  
48  
49  
50  
51  
52  
53  
54  
55  
56  
57  
58  
59  
60

1  
2  
3  $\geq 17$  in and witnessed apnoeas (specificity 80%, overall accuracy 69%, ROC AUC 0.722,  
4  
5  $p < 0.001$ ).

### 9 10 **Discussion**

11 This is the first study to prospectively evaluate the utility of the Berlin, STOP and STOP-  
12 BANG questionnaires in prediction of sleep disordered breathing in a population referred to a  
13 tertiary sleep service for assessment of possible OSA. We found that in this population the  
14 Berlin Questionnaire had no significant association with cut-points of  $\geq 5$  or  $\geq 15$  for AHI, but  
15 that both the STOP and STOP-BANG scores were significantly associated with both cut-  
16 points. The STOP-BANG Questionnaire had better performance for the prediction of OSA on  
17 home sleep study, and different cut-points for STOP-BANG score could be selected  
18 depending on preference to exclude SDB (score  $< 3$ ) or predict SDB (score  $\geq 6$ ). In addition,  
19 we found notable associations between sleep study results and several patient characteristics.  
20 In particular, neck circumference and witnessed apnoeas were found to be independent  
21 predictors of SDB in our population.  
22  
23  
24  
25  
26  
27  
28  
29  
30  
31  
32  
33  
34  
35  
36  
37  
38  
39  
40  
41  
42  
43  
44  
45  
46  
47  
48  
49  
50  
51  
52  
53  
54  
55  
56  
57  
58  
59  
60

In our study, the Berlin Questionnaire was almost ubiquitously positive (116 of 125  
participants had a positive result) and the positivity rate did not differ between those with and  
without SDB. This was expected as this questionnaire was designed for primary care  
assessment and our study population consisted of individuals referred from primary care with  
symptoms suggestive of SDB. Our results indicate that the Berlin Questionnaire is not useful  
in the prediction of SDB in the sleep clinic referral population and this is consistent with  
previous reports.<sup>(19)</sup> However, the high sensitivities obtained for both AHI cut-points  
support previous findings that the Berlin Questionnaire may have a role as a “rule-out”

1  
2  
3 measurement in the primary care or screening setting(15, 17, 20, 24), though there have been  
4  
5 some conflicting results, suggesting it does not have adequate discriminatory power.(16, 22)  
6  
7

8  
9  
10 In our study Epworth Sleepiness Scale data indicated that two thirds of participants had  
11  
12 excessive daytime somnolence (ESS  $\geq 11$ ), however scores were similar in individuals with or  
13  
14 without SDB. Therefore, at least in the sleep clinic population, the ESS does not have utility  
15  
16 in the prediction of SDB. Nevertheless, it may be clinically useful in other respects - perhaps  
17  
18 modified and/or combined with other structured questions, including those highlighted in this  
19  
20 study - in prediction of compliance with and benefit from OSA treatment in patients with any  
21  
22 degree of SDB. Exhaled nitric oxide levels were not significantly different between  
23  
24 individuals with or without SDB whether defined by an AHI cut-point of  $\geq 5$  or  $\geq 15$ . There is  
25  
26 conflicting data in the literature regarding whether  $F_{E}NO$  is associated with SDB,(29-32)  
27  
28 however our results suggest that it does not have utility in prediction of SDB; further work is  
29  
30 required to clarify this.  
31  
32  
33  
34  
35

36 We found that both the STOP and STOP-BANG questionnaires have utility in the prediction  
37  
38 of SDB in the sleep clinic population, and that STOP-BANG was superior, with higher  
39  
40 overall predictive accuracy. The STOP and STOP-BANG Questionnaires were developed  
41  
42 and validated in a surgical population using in-laboratory polysomnography(23) and have  
43  
44 subsequently been studied in a cardiovascular disease population.(25) Our results are in  
45  
46 agreement with these two earlier studies as regards the increased predictive value of STOP-  
47  
48 BANG over STOP. In contrast to these earlier studies, however, we found sensitivities to be  
49  
50 higher and specificities to be lower for both cut-points of AHI. This is as expected given that  
51  
52 we were studying a symptomatic cohort referred to a sleep clinic, rather than a screening  
53  
54 population, and this is also a desirable outcome for these questionnaires in situations where  
55  
56  
57  
58  
59  
60

1  
2  
3 missing even mild OSA would be undesirable. The negative likelihood ratios of  $<0.2$   
4  
5 obtained for STOP and STOP-BANG indicate that these questionnaires are likely most useful  
6  
7 for predicting low risk of confirming SDB: these may be of future value in combination in the  
8  
9 primary care setting, perhaps combined with screening sleep studies, to determine  
10  
11 requirement for sleep clinic review and detailed polygraphy.  
12  
13

14  
15  
16 At the AHI cut-point of  $\geq 15$ , STOP-BANG had sensitivity and negative predictive value of  
17  
18 100%, and since this is the standard cut-point conventionally used to determine need for  
19  
20 CPAP,(28) we suggest that the STOP-BANG questionnaire is the preferred tool for prediction  
21  
22 of SDB in the sleep clinic setting of those currently available. STOP-BANG, perhaps with  
23  
24 modifications, seems worthwhile for further exploration for the prediction of sleep study  
25  
26 findings in a larger cohort and, more importantly, prediction of clinical outcomes including  
27  
28 treatment success in symptomatic and screening populations.  
29  
30  
31

32  
33  
34 The original STOP-BANG questionnaire uses a cut-point of  $\geq 3$  to predict SDB.(23)  
35  
36 However, in our study we show that different cut-points can be selected depending on the  
37  
38 preference to rule-in or rule-out SDB. A score of  $\geq 3$  had the highest overall accuracy and a  
39  
40 sensitivity of 0.93 for the AHI cut-point of  $\geq 5$ , whereas a score of  $\geq 6$  had the highest overall  
41  
42 accuracy and a specificity of 0.78 for the AHI cut-point of  $\geq 15$ . Two other studies have  
43  
44 examined the usefulness of different cut-points for STOP-BANG score.(33-34) In the obese,  
45  
46 a score of  $\geq 3$  was associated with a sensitivity of 0.90 for predicting an AHI  $>5$ , whilst, a  
47  
48 score of  $\geq 6$  had a specificity of 0.88 for predicting an AHI  $>15$  and similar results were  
49  
50 obtained in the morbidly obese(33) and in another surgical population.(34) Thus, in the sleep  
51  
52 clinic setting where the ultimate goal is to identify patients requiring CPAP, a higher cut-point  
53  
54  
55  
56  
57  
58  
59  
60

1  
2  
3 for STOP-BANG may be preferred whereas in a primary care setting where the priority is not  
4  
5 to miss disease a lower cut-point may be chosen.  
6  
7

8  
9  
10 The STOP-BANG questionnaire is, however, still an imperfect tool for prediction of results  
11  
12 on home polygraphy. Accordingly, the secondary objective of our study was to identify those  
13  
14 variables for inclusion, and how they should be weighted in a locally developed composite  
15  
16 score for future validation in the sleep clinic and potentially wider population. Univariate  
17  
18 analysis showed several significant, expected associations for both cut-points of AHI. Using  
19  
20 multivariate analysis, neck circumference  $\geq 17$  in and the presence of witnessed apnoeas were  
21  
22 independent predictors of SDB. Particularly when SDB was defined by an AHI cut-point of  
23  
24  $\geq 5$ , the regression model derived indicated a high probability of SDB of 0.94 if both factors  
25  
26 were present. The STOP-BANG questionnaire, of course, includes both of these variables,  
27  
28 and it is possible that adjustment of the inclusion variables, or their weighting, might improve  
29  
30 its performance. In future work, we aim to validate a simple composite score based on these  
31  
32 two variables in a modification of the STOP-BANG Questionnaire, to determine utility for  
33  
34 predicting sleep study data and outcomes with treatment.  
35  
36  
37  
38  
39

40  
41 A possible limitation of our study was that SDB was characterised using home unattended  
42  
43 limited sleep studies rather than in-hospital attended full polysomnography. The latter is  
44  
45 considered the gold standard for diagnosis of SDB but is more expensive, less easily accessed  
46  
47 and potentially unrepresentative with sleep in an unfamiliar environment. Home unattended  
48  
49 and in-hospital attended sleep studies have previously been shown to produce similar results.  
50  
51 (35) Accordingly home testing with portable monitors is standard clinical practice in the UK,  
52  
53 and is now considered an acceptable method for diagnosis of OSA by the American Academy  
54  
55 of Sleep Medicine.(28) The sample size limits the conclusions that can be drawn from  
56  
57  
58  
59  
60

1  
2  
3 multivariate analysis, however this was a secondary objective of the current study. It is  
4 possible that variables predictive of SDB on univariate analysis in this cohort would have  
5 been identified as independently predictive in multivariate models in a larger population. The  
6 results of this study allow us, and potentially others, to focus future work to validate more  
7 extensively the results obtained to date.  
8  
9  
10  
11  
12

13  
14  
15  
16 In conclusion, the Berlin Questionnaire was not useful in the prediction of SDB within our  
17 sleep clinic population. The STOP-BANG questionnaire had superior predictive performance  
18 to the STOP questionnaire at both cut-points of AHI ( $\geq 5$  and  $\geq 15$ ). A STOP-BANG score of  
19  $\geq 3$  had the highest overall accuracy and a sensitivity of 0.93 for the prediction of an AHI  $\geq 5$ ,  
20 whilst a score of  $\geq 6$  had the highest overall accuracy and a specificity of 0.78 for the  
21 prediction of an AHI  $\geq 15$ . Future work will validate a composite score including neck  
22 circumference  $\geq 17$ in and the presence of witnessed apnoeas for the prediction of SDB in the  
23 sleep clinic referral population, with possibility then of evaluating in primary care and against  
24 treatment outcomes, with our overall aim to provide required tools for use in expanded and  
25 consolidated sleep services, given the obesity and OSA epidemics.  
26  
27  
28  
29  
30  
31  
32  
33  
34  
35  
36  
37  
38  
39  
40  
41  
42  
43  
44  
45  
46  
47  
48  
49  
50  
51  
52  
53  
54  
55  
56  
57  
58  
59  
60



**Contributorship Statement:**

Douglas Cowan took a leading role in study protocol development, study document development, application for ethics approval, data collection, statistical analysis and paper writing.

Gwen Allardice provided statistical support and performed part of the statistical analysis.

Duncan MacFarlane, Darren Ramsay and Heather Ambler contributed to data collection, and carried out and scored sleep studies.

Stephen Banham contributed to study protocol development.

Eric Livingston contributed to study protocol development, study document development, application for ethics approval and paper writing.

Christopher Carlin contributed to study protocol development, data collection, statistical analysis and paper writing.

All authors approved the final draft before submission.

Christopher Carlin is responsible for the overall content as guarantor.

**Competing Interest:** None to declare.

Additional unpublished data from this study is available on request by email.

**Funding:** There was no funding for this study.

**Data Sharing Statement:** Additional unpublished data from this study is available on request by email.

This study was approved by the West of Scotland Regional Ethics Committee.

## References

1. Young T, Palta M, Dempsey J, et al. The occurrence of sleep-disordered breathing among middle-aged adults. *N Engl J Med*. 1993;328(17):1230-5.
2. Jordan AS, McSharry DG, Malhotra A. Adult obstructive sleep apnoea. *Lancet*. 2013; published online August 6. DOI:10.1016/S0140-6736(13)60734-5.
3. McNicholas WT. Diagnosis of obstructive sleep apnea in adults. *Proc Am Thorac Soc*. 2008;5(2):154-60.
4. Lacasse Y, Godbout C, Series F. Health-related quality of life in obstructive sleep apnoea. *Eur Respir J*. 2002;19(3):499-503.
5. Engleman HM, Douglas NJ. Sleep. 4: Sleepiness, cognitive function, and quality of life in obstructive sleep apnoea/hypopnoea syndrome. *Thorax*. 2004;59(7):618-22.
6. Teran-Santos J, Jimenez-Gomez A, Cordero-Guevara J. The association between sleep apnea and the risk of traffic accidents. *N Engl J Med*. 1999;340(11):847-51.
7. Robinson GV, Stradling JR, Davies RJ. Sleep . 6: obstructive sleep apnoea/hypopnoea syndrome and hypertension. *Thorax*. 2004;59(12):1089-94.
8. Lattimore JD, Celermajer DS, Wilcox I. Obstructive sleep apnea and cardiovascular disease. *J Am Coll Cardiol*. 2003;41(9):1429-37.
9. Svatikova A, Wolk R, Gami AS, et al. Interactions between obstructive sleep apnea and the metabolic syndrome. *Curr Diab Rep*. 2005;5(1):53-8.
10. Meslier N, Gagnadoux F, Giraud P, et al. Impaired glucose-insulin metabolism in males with obstructive sleep apnoea syndrome. *Eur Respir J*. 2003;22(1):156-60.
11. Young T, Evans L, Finn L, et al. Estimation of the clinically diagnosed proportion of sleep apnea syndrome in middle-aged men and women. *Sleep*. 1997;20(9):705-6.
12. Heffner JE, Rozenfeld Y, Kai M, et al. Prevalence of diagnosed sleep apnea among patients with type 2 diabetes in primary care. *Chest*. 2012;141(6):1414-21.
13. Wang Y, Lobstein T. Worldwide trends in childhood overweight and obesity. *Int J Pediatr Obes*. 2006;1(1):11-25.
14. Flegal KM, Carroll MD, Ogden CL, et al. Prevalence and trends in obesity among US adults, 1999-2000. *JAMA*. 2002;288(14):1723-7.
15. Netzer NC, Stoohs RA, Netzer CM, et al. Using the Berlin Questionnaire to identify patients at risk for the sleep apnea syndrome. *Ann Intern Med*. 1999;131(7):485-91.
16. Sert Kuniyoshi FH, Zellmer MR, Calvin AD, et al. Diagnostic accuracy of the Berlin Questionnaire in detecting sleep-disordered breathing in patients with a recent myocardial infarction. *Chest*. 2011;140(5):1192-7.
17. Best MW, Fitzpatrick M, Milev R, et al. Utility of the Berlin questionnaire for predicting obstructive sleep apnea in individuals with treatment-resistant depression. *Sleep Breath*. 2013; published online April 12. DOI:10.1007/s11325-013-0827-2.
18. Kang K, Park KS, Kim JE, et al. Usefulness of the Berlin Questionnaire to identify patients at high risk for obstructive sleep apnea: a population-based door-to-door study. *Sleep Breath*. 2013;17(2):803-10.
19. Ahmadi N, Chung SA, Gibbs A, et al. The Berlin questionnaire for sleep apnea in a sleep clinic population: relationship to polysomnographic measurement of respiratory disturbance. *Sleep Breath*. 2008;12(1):39-45.
20. Bouloukaki I, Komninos ID, Mermigkis C, et al. Translation and validation of Berlin questionnaire in primary health care in Greece. *BMC Pulm Med*. 2013;13:6.

21. Saleh AB, Ahmad MA, Awadalla NJ. Development of Arabic version of Berlin questionnaire to identify obstructive sleep apnea at risk patients. *Ann Thorac Med*. 2011;6(4):212-6.
22. Sforza E, Chouchou F, Pichot V, et al. Is the Berlin questionnaire a useful tool to diagnose obstructive sleep apnea in the elderly? *Sleep Med*. 2011;12(2):142-6.
23. Chung F, Yegneswaran B, Liao P, et al. STOP questionnaire: a tool to screen patients for obstructive sleep apnea. *Anesthesiology*. 2008;108(5):812-21.
24. Chung F, Yegneswaran B, Liao P, et al. Validation of the Berlin questionnaire and American Society of Anesthesiologists checklist as screening tools for obstructive sleep apnea in surgical patients. *Anesthesiology*. 2008;108(5):822-30.
25. Silva GE, Vana KD, Goodwin JL, et al. Identification of patients with sleep disordered breathing: comparing the four-variable screening tool, STOP, STOP-Bang, and Epworth Sleepiness Scales. *J Clin Sleep Med*. 2011;7(5):467-72.
26. Johns MW. A new method for measuring daytime sleepiness: the Epworth sleepiness scale. *Sleep*. 1991;14(6):540-5.
27. Sleep-related breathing disorders in adults: recommendations for syndrome definition and measurement techniques in clinical research. The Report of an American Academy of Sleep Medicine Task Force. *Sleep*. 1999;22(5):667-89.
28. Epstein LJ, Kristo D, Strollo PJ, Jr., et al. Clinical guideline for the evaluation, management and long-term care of obstructive sleep apnea in adults. *J Clin Sleep Med*. 2009;5(3):263-76.
29. Chua AP, Aboussouan LS, Minai OA, et al. Long-term continuous positive airway pressure therapy normalizes high exhaled nitric oxide levels in obstructive sleep apnea. *J Clin Sleep Med*. 2013;9(6):529-35.
30. Fortuna AM, Miralda R, Calaf N, et al. Airway and alveolar nitric oxide measurements in obstructive sleep apnea syndrome. *Respir Med*. 2011;105(4):630-6.
31. Depalo A, Carpagnano GE, Spanevello A, et al. Exhaled NO and iNOS expression in sputum cells of healthy, obese and OSA subjects. *J Intern Med*. 2008;263(1):70-8.
32. Agustí AG, Barbe F, Togo B. Exhaled nitric oxide in patients with sleep apnea. *Sleep*. 1999;22(2):231-5.
33. Chung F, Yang Y, Liao P. Predictive Performance of the STOP-Bang Score for Identifying Obstructive Sleep Apnea in Obese Patients. *Obes Surg*. 2013; published online June 19. DOI:10.1007/s11695-013-1006-z.
34. Chung F, Subramanyam R, Liao P, et al. High STOP-Bang score indicates a high probability of obstructive sleep apnoea. *Br J Anaesth*. 2012;108(5):768-75.
35. Iber C, Redline S, Kaplan Gilpin AM, et al. Polysomnography performed in the unattended home versus the attended laboratory setting--Sleep Heart Health Study methodology. *Sleep*. 2004;27(3):536-40.

**Table 1:** Comparison of patient characteristics including anthropometric measurements, co-morbidities, symptoms, inflammatory markers, lipid profile and oximetry between groups without and with SDB as defined by AHI <5 events/hour and  $\geq 15$  events/hour.

|                                                          | <i>AHI&lt;5</i>      | <i>AHI<math>\geq</math>5</i> | <i>p</i>         | <i>AHI&lt;15</i>     | <i>AHI<math>\geq</math>15</i> | <i>P</i>         |
|----------------------------------------------------------|----------------------|------------------------------|------------------|----------------------|-------------------------------|------------------|
| <i>Male gender</i>                                       | <b>15/32 (47%)</b>   | <b>67/97 (69%)</b>           | <b>0.034</b>     | <b>38/73 (52%)</b>   | <b>44/56 (79%)</b>            | <b>0.003</b>     |
| <i>Age (yrs)</i>                                         | <b>44 (12)</b>       | <b>51 (11)</b>               | <b>0.004</b>     | 48 (13)              | 51 (9)                        | 0.103            |
| <i>Weight (kg)</i>                                       | <b>89 (19)</b>       | <b>101 (22)</b>              | <b>0.022</b>     | <b>92 (21)</b>       | <b>107 (20)</b>               | <b>0.001</b>     |
| <i>BMI (kg/m<sup>2</sup>)</i>                            | 31 (28-36)           | 33 (29-40)                   | 0.118            | <b>31 (27-36)</b>    | <b>34 (31-41)</b>             | <b>0.009</b>     |
| <i>Obesity (BMI<math>\geq</math>30 kg/m<sup>2</sup>)</i> | 18/28 (64%)          | 61/85 (72%)                  | 0.482            | <b>38/63 (60%)</b>   | <b>41/50 (82%)</b>            | <b>0.014</b>     |
| <i>Neck circumference (in)</i>                           | <b>15 (2)</b>        | <b>17(2)</b>                 | <b>&lt;0.001</b> | <b>16 (2)</b>        | <b>17 (1)</b>                 | <b>&lt;0.001</b> |
| <i>Neck circumference <math>\geq</math>17in</i>          | <b>4/22 (18%)</b>    | <b>45/76 (59%)</b>           | <b>0.001</b>     | <b>18/54 (33%)</b>   | <b>31/44 (70%)</b>            | <b>&lt;0.001</b> |
| <i>Mallampatti</i>                                       | 2 (1)                | 2 (1)                        | 0.192            | 2 (1)                | 2 (1)                         | 0.900            |
| <i>SBP (mmHg)</i>                                        | 134 (17)             | 136 (16)                     | 0.480            | 134 (15)             | 138 (18)                      | 0.194            |
| <i>DBP (mmHg)</i>                                        | 82 (11)              | 83 (9)                       | 0.528            | 81 (10)              | 85 (10)                       | 0.086            |
| <i>Diabetes</i>                                          | 2/32 (6%)            | 6/97 (6%)                    | 1.000            | 4/73 (5%)            | 4/56 (7%)                     | 0.727            |
| <i>Hypertension</i>                                      | 7/32 (22%)           | 36/97 (37%)                  | 0.134            | <b>18/73 (25%)</b>   | <b>25/56 (45%)</b>            | <b>0.024</b>     |
| <i>Hyperlipidaemia</i>                                   | 2/32 (6%)            | 18/97 (19%)                  | 0.156            | 10/73 (14%)          | 10/56 (18%)                   | 0.625            |
| <i>Loud snorer</i>                                       | 28/32 (88%)          | 92/97 (95%)                  | 0.224            | 65/73 (89%)          | 55/56 (98%)                   | 0.077            |
| <i>Witnessed apnoeas</i>                                 | <b>15/32 (47%)</b>   | <b>72/97 (74%)</b>           | <b>0.008</b>     | <b>40/73 (55%)</b>   | <b>47/56 (84%)</b>            | <b>&lt;0.001</b> |
| <i>Nocturia*</i>                                         | 11/32 (34%)          | 38/97 (39%)                  | 0.679            | 26/73 (36%)          | 23/56 (41%)                   | 0.585            |
| <i>Nocturnal wakenings*</i>                              | 18/32 (56%)          | 65/97 (67%)                  | 0.293            | 46/73 (63%)          | 37/56 (66%)                   | 0.853            |
| <i>Nocturnal choking</i>                                 | 15/32 (47%)          | 35/97 (36%)                  | 0.301            | 28/73 (38%)          | 22/56 (39%)                   | 1.000            |
| <i>Nocturnal gasping</i>                                 | 11/32 (34%)          | 38/97 (39%)                  | 0.679            | 26/73 (36%)          | 23/56 (41%)                   | 0.585            |
| <i>F<sub>e</sub>NO (ppb)</i>                             | 15 (12-25)           | 18 (12-26)                   | 0.595            | 15 (11-24)           | 19 (12-27)                    | 0.050            |
| <i>Cholesterol (mmol/L)</i>                              | 5.2 (1.1)            | 5.4 (1.0)                    | 0.431            | 5.3 (1.1)            | 5.4 (0.9)                     | 0.674            |
| <i>HDL cholesterol (mmol/L)</i>                          | <b>1.3 (1.0-1.5)</b> | <b>1.1 (1.0-1.3)</b>         | <b>0.008</b>     | <b>1.2 (1.0-1.4)</b> | <b>1.1 (1.0-1.2)</b>          | <b>0.016</b>     |
| <i>Triglycerides (mmol/L)</i>                            | <b>1.9 (1.0-2.5)</b> | <b>2.2 (1.5-3.2)</b>         | <b>0.015</b>     | <b>1.9 (1.3-2.9)</b> | <b>2.3 (1.6-3.2)</b>          | <b>0.042</b>     |
| <i>Cholesterol/HDL</i>                                   | <b>4.1 (3.3-5.0)</b> | <b>4.7 (3.8-5.7)</b>         | <b>0.011</b>     | <b>4.3 (3.5-5.6)</b> | <b>4.8 (4.0-5.8)</b>          | <b>0.022</b>     |
| <i>HbA1c (mmol/mol)</i>                                  | <b>34 (32-37)</b>    | <b>38 (36-41)</b>            | <b>0.001</b>     | <b>36 (33-39)</b>    | <b>38 (36-42)</b>             | <b>0.002</b>     |
| <i>CRP</i>                                               | 3.0 (1.2-8.5)        | 3.8 (1.4-7.5)                | 0.608            | 3.0 (1.3-7.6)        | 4.3 (1.4-8.6)                 | 0.173            |

Legend for Table 1: Data presented as mean (standard deviation), median (interquartile

range) or proportion (percentage) as appropriate. Significant differences in bold. \*  $\geq 2$ /night.

Abbreviations: BMI, body mass index; SBP, systolic blood pressure; DBP, diastolic blood pressure; F<sub>e</sub>NO, fraction of exhaled nitric oxide; HDL, high density lipoprotein; HbA1c, glycated haemoglobin; CRP, C-reactive protein; ODI, oxygen desaturation index; SpO<sub>2</sub>, oxygen saturation; SpO<sub>2</sub> t<90, duration of time for which oxygen saturation less than 90%.

**Table 2:** Comparison of results of Epworth Sleepiness Scale (ESS) and Berlin, STOP and STOP-BANG Questionnaires between groups without and with SDB as defined by AHI <5 events/hour and  $\geq 15$  events/hour.

|                                              | <i>AHI</i> <5      | <i>AHI</i> $\geq$ 5 | <i>p</i>         | <i>AHI</i> <15     | <i>AHI</i> $\geq$ 15 | <i>p</i>         |
|----------------------------------------------|--------------------|---------------------|------------------|--------------------|----------------------|------------------|
| <i>ESS score</i>                             | 13 (8-16)          | 13 (7-17)           | 0.845            | 13 (7-16)          | 13 (9-18)            | 0.476            |
| <i>ESS +ve (<math>\geq 11/24</math>)</i>     | 17/28 (61%)        | 63/92 (68%)         | 0.496            | 42/66 (64%)        | 38/54 (70%)          | 0.560            |
| <i>Berlin +ve</i>                            | 29/31 (94%)        | 87/94 (93%)         | 1.000            | 65/71 (92%)        | 51/54 (94%)          | 0.731            |
| <i>STOP score</i>                            | <b>2.5 (2-3)</b>   | <b>3 (2-3)</b>      | <b>0.011</b>     | <b>3 (2-3)</b>     | <b>3 (3-3.5)</b>     | <b>&lt;0.001</b> |
| <i>STOP +ve (<math>\geq 2/4</math>)</i>      | <b>27/32 (84%)</b> | <b>93/96 (97%)</b>  | <b>0.023</b>     | 66/73 (90%)        | 54/55 (98%)          | 0.137            |
| <i>STOP-BANG score</i>                       | <b>4 (2-5)</b>     | <b>5 (5-6)</b>      | <b>&lt;0.001</b> | <b>5 (2-5)</b>     | <b>6 (5-6)</b>       | <b>&lt;0.001</b> |
| <i>STOP-BANG +ve (<math>\geq 3/8</math>)</i> | <b>21/30 (70%)</b> | <b>88/93 (95%)</b>  | <b>&lt;0.001</b> | <b>54/68 (79%)</b> | <b>55/55 (100%)</b>  | <b>&lt;0.001</b> |

Legend for Table 2: Data presented as median (interquartile range) or proportion (percentage)

as appropriate. Significant differences in bold.

**Table 3:** Sensitivities, specificities, positive predictive values (PPV), negative predictive values (NPV), likelihood ratios positive (LR+), likelihood ratios negative (LR-), and overall accuracies of the Berlin, STOP and STOP-BANG Questionnaires for prediction of significant SDB as defined by: A: AHI  $\geq$ 5 events/hour; B: AHI  $\geq$ 15 events/hour.

A: Cut-point = AHI  $\geq$ 5 events/hour

|                  | <i>Sensitivity</i>  | <i>Specificity</i>  | <i>PPV</i>          | <i>NPV</i>          | <i>LR+</i> | <i>LR-</i> | <i>Accuracy</i> |
|------------------|---------------------|---------------------|---------------------|---------------------|------------|------------|-----------------|
| <i>Berlin</i>    | 0.93<br>(0.85-0.97) | 0.06<br>(0.01-0.21) | 0.75<br>(0.66-0.83) | 0.22<br>(0.03-0.60) | 0.99       | 1.15       | 71%             |
| <i>STOP</i>      | 0.97<br>(0.91-0.99) | 0.16<br>(0.05-0.33) | 0.78<br>(0.69-0.85) | 0.62<br>(0.24-0.91) | 1.15       | 0.20       | 77%             |
| <i>STOP-BANG</i> | 0.95<br>(0.88-0.98) | 0.30<br>(0.15-0.49) | 0.81<br>(0.72-0.88) | 0.64<br>(0.35-0.87) | 1.35       | 0.18       | 79%             |

B: Cut-point = AHI  $\geq$ 15 events/hour

|                  | <i>Sensitivity</i>  | <i>Specificity</i>  | <i>PPV</i>          | <i>NPV</i>          | <i>LR+</i> | <i>LR-</i> | <i>Accuracy</i> |
|------------------|---------------------|---------------------|---------------------|---------------------|------------|------------|-----------------|
| <i>Berlin</i>    | 0.94<br>(0.85-0.99) | 0.08<br>(0.03-0.17) | 0.44<br>(0.35-0.53) | 0.67<br>(0.30-0.92) | 1.03       | 0.66       | 46%             |
| <i>STOP</i>      | 0.98<br>(0.90-1.00) | 0.10<br>(0.04-0.19) | 0.45<br>(0.36-0.54) | 0.88<br>(0.47-1.00) | 1.09       | 0.19       | 48%             |
| <i>STOP-BANG</i> | 1.00<br>(0.94-1.00) | 0.21<br>(0.12-0.32) | 0.50<br>(0.41-0.60) | 1.00<br>(0.77-1.00) | 1.26       | 0.00       | 56%             |

Legend for Table 3: Data presented with 95% confidence intervals.

**Table 4:** Sensitivities, specificities, positive predictive values (PPV), negative predictive values (NPV), likelihood ratios positive (LR+), likelihood ratios negative (LR-), and overall accuracies of different cut-points of the STOP-BANG questionnaire for prediction of significant SDB as defined by: A: AHI  $\geq 5$  events/hour; B: AHI  $\geq 15$  events/hour.

A: Cut-point = AHI  $\geq 5$  events/hour

| <i>STOP-BANG cut-point (/8)</i> | <i>Proportion +ve SB</i> | <i>Sensitivity</i>  | <i>Specificity</i>  | <i>PPV</i>          | <i>NPV</i>          | <i>LR+</i> | <i>LR-</i> | <i>Accuracy</i> |
|---------------------------------|--------------------------|---------------------|---------------------|---------------------|---------------------|------------|------------|-----------------|
| $\geq 2$                        | 92/96                    | 0.99<br>(0.92-1.00) | 0.12<br>(0.03-0.32) | 0.77<br>(0.67-0.85) | 0.75<br>(0.19-0.99) | 1.13       | 0.11       | 77%             |
| $\geq 3$                        | 82/96                    | 0.93<br>(0.84-0.98) | 0.38<br>(0.19-0.59) | 0.82<br>(0.72-0.89) | 0.64<br>(0.35-0.87) | 1.49       | 0.18       | 79%             |
| $\geq 4$                        | 79/96                    | 0.90<br>(0.81-0.96) | 0.42<br>(0.22-0.63) | 0.82<br>(0.72-0.90) | 0.59<br>(0.33-0.82) | 1.55       | 0.23       | 78%             |
| $\geq 5$                        | 67/96                    | 0.81<br>(0.70-0.89) | 0.62<br>(0.41-0.81) | 0.87<br>(0.76-0.94) | 0.52<br>(0.32-0.71) | 2.15       | 0.31       | 76%             |
| $\geq 6$                        | 38/96                    | 0.46<br>(0.34-0.58) | 0.79<br>(0.58-0.93) | 0.87<br>(0.72-0.96) | 0.33<br>(0.21-0.46) | 2.20       | 0.68       | 54%             |
| $\geq 7$                        | 15/96                    | 0.18<br>(0.10-0.29) | 0.92<br>(0.73-0.99) | 0.87<br>(0.60-0.98) | 0.27<br>(0.18-0.38) | 2.17       | 0.89       | 36%             |
| 8                               | 5/96                     | 0.07<br>(0.02-0.15) | 1.00<br>(0.86-1.00) | 1.00<br>(0.48-1.00) | 0.26<br>(0.18-0.37) | -          | 0.93       | 30%             |

B: Cut-point = AHI  $\geq 15$  events/hour

| <i>STOP-BANG cut-point (/8)</i> | <i>Proportion +ve SB</i> | <i>Sensitivity</i>  | <i>Specificity</i>  | <i>PPV</i>          | <i>NPV</i>          | <i>LR+</i> | <i>LR-</i> | <i>Accuracy</i> |
|---------------------------------|--------------------------|---------------------|---------------------|---------------------|---------------------|------------|------------|-----------------|
| $\geq 2$                        | 92/96                    | 1.00<br>(0.91-1.00) | 0.07<br>(0.02-0.18) | 0.45<br>(0.34-0.55) | 1.00<br>(0.40-1.00) | 1.08       | 0          | 47%             |
| $\geq 3$                        | 82/96                    | 1.00<br>(0.91-1.00) | 0.25<br>(0.15-0.39) | 0.50<br>(0.39-0.61) | 1.00<br>(0.77-1.00) | 1.34       | 0          | 57%             |
| $\geq 4$                        | 79/96                    | 1.00<br>(0.91-1.00) | 0.31<br>(0.19-0.45) | 0.52<br>(0.40-0.63) | 1.00<br>(0.80-1.00) | 1.45       | 0          | 60%             |
| $\geq 5$                        | 67/96                    | 0.93<br>(0.80-0.98) | 0.47<br>(0.34-0.61) | 0.57<br>(0.44-0.69) | 0.90<br>(0.73-0.98) | 1.76       | 0.15       | 67%             |
| $\geq 6$                        | 38/96                    | 0.63<br>(0.47-0.78) | 0.78<br>(0.65-0.88) | 0.68<br>(0.51-0.82) | 0.74<br>(0.61-0.85) | 2.91       | 0.47       | 72%             |
| $\geq 7$                        | 15/96                    | 0.22<br>(0.11-0.38) | 0.89<br>(0.78-0.96) | 0.60<br>(0.32-0.84) | 0.60<br>(0.49-0.71) | 2.01       | 0.88       | 60%             |
| 8                               | 5/96                     | 0.10<br>(0.03-0.23) | 0.98<br>(0.90-1.00) | 0.80<br>(0.28-0.99) | 0.59<br>(0.48-0.70) | 5.36       | 0.92       | 60%             |

Legend for Table 4: Data presented with 95% confidence intervals. Abbreviations: SB,

STOP-BANG.



**Table 5:** Probabilities of SDB using a composite score based on neck circumference ( $\geq 17$ in or  $< 17$ in) and presence (1) or absence (0) of witnessed apnoeas derived from logistic regression models. SDB defined by: A: AHI  $\geq 5$  events/hour; B: AHI  $\geq 15$  events/hour.

A: Cut-point = AHI  $\geq 5$  events/hour

| <i>Neck Circumference (in)</i> | <i>Witnessed Apnoeas</i> |          |
|--------------------------------|--------------------------|----------|
|                                | <i>0</i>                 | <i>1</i> |
| <i>&lt;17</i>                  | 0.47                     | 0.75     |
| <i><math>\geq 17</math></i>    | 0.83                     | 0.94     |

B: Cut-point = AHI  $\geq 15$  events/hour

| <i>Neck Circumference (in)</i> | <i>Witnessed Apnoeas</i> |          |
|--------------------------------|--------------------------|----------|
|                                | <i>0</i>                 | <i>1</i> |
| <i>&lt;17</i>                  | 0.17                     | 0.40     |
| <i><math>\geq 17</math></i>    | 0.40                     | 0.69     |



**Table 6:** Sensitivities, specificities, positive predictive values (PPV), negative predictive values (NPV), and overall accuracies of logistic models for prediction of SDB as defined by:

A: AHI  $\geq 5$  events/hour; predict SDB *unless* neck  $< 17$ in *and* witnessed apnoeas absent; B:

AHI  $\geq 15$  events/hour; predict SDB *only if* neck  $\geq 17$ in *and* witnessed apnoeas present.

| <i>Model</i> | <i>Sensitivity</i>  | <i>Specificity</i>  | <i>PPV</i>          | <i>NPV</i>          | <i>Accuracy</i> |
|--------------|---------------------|---------------------|---------------------|---------------------|-----------------|
| A            | 0.84<br>(0.75-0.91) | 0.54<br>(0.34-0.72) | 0.85<br>(0.76-0.92) | 0.52<br>(0.32-0.71) | 77%             |
| B            | 0.56<br>(0.41-0.70) | 0.80<br>(0.68-0.89) | 0.69<br>(0.53-0.82) | 0.69<br>(0.57-0.79) | 69%             |

Legend for Table 6: Data presented with 95% confidence intervals.

1  
2  
3 **Figure 1:** ROC curves of logistic models for prediction of SDB as defined by: A: AHI  $\geq 5$   
4 events/hour; predict SDB *unless* neck  $< 17$ in *and* witnessed apnoeas absent; B: AHI  $\geq 15$   
5 events/hour; predict SDB *only if* neck  $\geq 17$ in *and* witnessed apnoeas present.  
6  
7  
8

9  
10 Model A:

11  
12 Model B:  
13  
14  
15  
16  
17  
18  
19  
20  
21  
22  
23  
24  
25  
26  
27  
28  
29  
30  
31  
32  
33  
34  
35  
36  
37  
38  
39  
40  
41  
42  
43  
44  
45  
46  
47  
48  
49  
50  
51  
52  
53  
54  
55  
56  
57  
58  
59  
60

For peer review only

1  
2  
3  
4  
5  
6  
7  
8  
9  
10  
11  
12  
13  
14  
15  
16  
17  
18  
19  
20  
21  
22  
23  
24  
25  
26  
27  
28  
29  
30  
31  
32  
33  
34  
35  
36  
37  
38  
39  
40  
41  
42  
43  
44  
45  
46  
47  
48  
49  
50  
51  
52  
53  
54  
55  
56  
57  
58  
59  
60

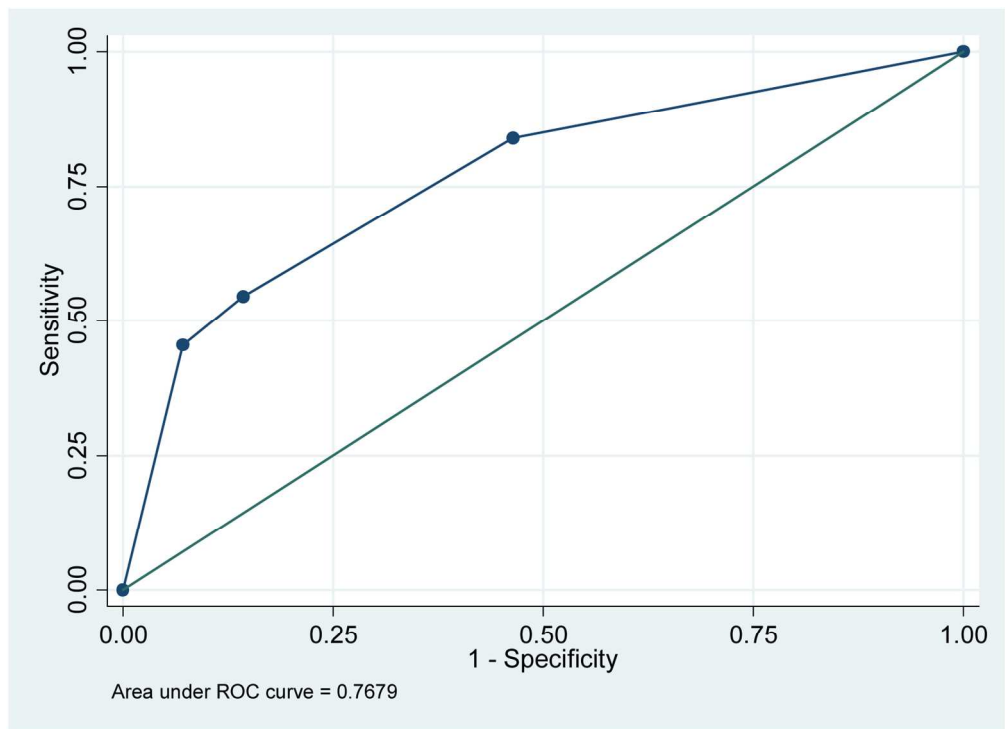

140x102mm (300 x 300 DPI)

view only

1  
2  
3  
4  
5  
6  
7  
8  
9  
10  
11  
12  
13  
14  
15  
16  
17  
18  
19  
20  
21  
22  
23  
24  
25  
26  
27  
28  
29  
30  
31  
32  
33  
34  
35  
36  
37  
38  
39  
40  
41  
42  
43  
44  
45  
46  
47  
48  
49  
50  
51  
52  
53  
54  
55  
56  
57  
58  
59  
60

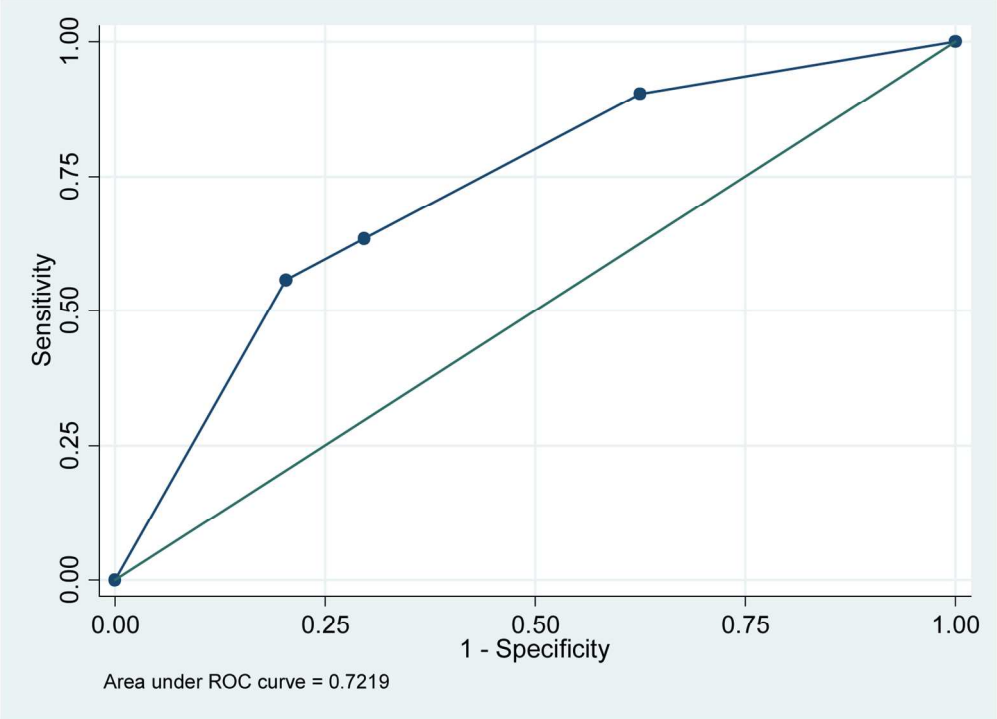

140x102mm (300 x 300 DPI)

view only

## STROBE Statement—checklist of items that should be included in reports of observational studies

|                              | Item No | Recommendation                                                                                                                                                                                                                                                                                                                                                                                                                                                         | Page |
|------------------------------|---------|------------------------------------------------------------------------------------------------------------------------------------------------------------------------------------------------------------------------------------------------------------------------------------------------------------------------------------------------------------------------------------------------------------------------------------------------------------------------|------|
| Title and abstract           | 1       | (a) Indicate the study's design with a commonly used term in the title or the abstract                                                                                                                                                                                                                                                                                                                                                                                 | 1    |
|                              |         | (b) Provide in the abstract an informative and balanced summary of what was done and what was found                                                                                                                                                                                                                                                                                                                                                                    | 3    |
| <b>Introduction</b>          |         |                                                                                                                                                                                                                                                                                                                                                                                                                                                                        |      |
| Background/rationale         | 2       | Explain the scientific background and rationale for the investigation being reported                                                                                                                                                                                                                                                                                                                                                                                   | 5    |
| Objectives                   | 3       | State specific objectives, including any prespecified hypotheses                                                                                                                                                                                                                                                                                                                                                                                                       | 6    |
| <b>Methods</b>               |         |                                                                                                                                                                                                                                                                                                                                                                                                                                                                        |      |
| Study design                 | 4       | Present key elements of study design early in the paper                                                                                                                                                                                                                                                                                                                                                                                                                | 6    |
| Setting                      | 5       | Describe the setting, locations, and relevant dates, including periods of recruitment, exposure, follow-up, and data collection                                                                                                                                                                                                                                                                                                                                        | 6    |
| Participants                 | 6       | (a) <i>Cohort study</i> —Give the eligibility criteria, and the sources and methods of selection of participants. Describe methods of follow-up<br><i>Case-control study</i> —Give the eligibility criteria, and the sources and methods of case ascertainment and control selection. Give the rationale for the choice of cases and controls<br><i>Cross-sectional study</i> —Give the eligibility criteria, and the sources and methods of selection of participants | 6    |
|                              |         | (b) <i>Cohort study</i> —For matched studies, give matching criteria and number of exposed and unexposed<br><i>Case-control study</i> —For matched studies, give matching criteria and the number of controls per case                                                                                                                                                                                                                                                 |      |
| Variables                    | 7       | Clearly define all outcomes, exposures, predictors, potential confounders, and effect modifiers. Give diagnostic criteria, if applicable                                                                                                                                                                                                                                                                                                                               | 7    |
| Data sources/<br>measurement | 8*      | For each variable of interest, give sources of data and details of methods of assessment (measurement). Describe comparability of assessment methods if there is more than one group                                                                                                                                                                                                                                                                                   | 7    |
| Bias                         | 9       | Describe any efforts to address potential sources of bias                                                                                                                                                                                                                                                                                                                                                                                                              | NA   |
| Study size                   | 10      | Explain how the study size was arrived at                                                                                                                                                                                                                                                                                                                                                                                                                              | NA   |
| Quantitative variables       | 11      | Explain how quantitative variables were handled in the analyses. If applicable, describe which groupings were chosen and why                                                                                                                                                                                                                                                                                                                                           | 8    |
| Statistical methods          | 12      | (a) Describe all statistical methods, including those used to control for confounding                                                                                                                                                                                                                                                                                                                                                                                  | 8    |
|                              |         | (b) Describe any methods used to examine subgroups and interactions                                                                                                                                                                                                                                                                                                                                                                                                    | 8    |
|                              |         | (c) Explain how missing data were addressed                                                                                                                                                                                                                                                                                                                                                                                                                            | 8    |
|                              |         | (d) <i>Cohort study</i> —If applicable, explain how loss to follow-up was addressed<br><i>Case-control study</i> —If applicable, explain how matching of cases and controls was addressed<br><i>Cross-sectional study</i> —If applicable, describe analytical methods taking account of sampling strategy                                                                                                                                                              | NA   |
|                              |         | (e) Describe any sensitivity analyses                                                                                                                                                                                                                                                                                                                                                                                                                                  |      |

| <b>Results</b>           |     | <b>Page</b>                                                                                                                                                                                                  |            |
|--------------------------|-----|--------------------------------------------------------------------------------------------------------------------------------------------------------------------------------------------------------------|------------|
| Participants             | 13* | (a) Report numbers of individuals at each stage of study—eg numbers potentially eligible, examined for eligibility, confirmed eligible, included in the study, completing follow-up, and analysed            | 9          |
|                          |     | (b) Give reasons for non-participation at each stage                                                                                                                                                         | NA         |
|                          |     | (c) Consider use of a flow diagram                                                                                                                                                                           | NA         |
| Descriptive data         | 14* | (a) Give characteristics of study participants (eg demographic, clinical, social) and information on exposures and potential confounders                                                                     | 9,18       |
|                          |     | (b) Indicate number of participants with missing data for each variable of interest                                                                                                                          | 19         |
|                          |     | (c) <i>Cohort study</i> —Summarise follow-up time (eg, average and total amount)                                                                                                                             | NA         |
| Outcome data             | 15* | <i>Cohort study</i> —Report numbers of outcome events or summary measures over time                                                                                                                          | NA         |
|                          |     | <i>Case-control study</i> —Report numbers in each exposure category, or summary measures of exposure                                                                                                         | NA         |
|                          |     | <i>Cross-sectional study</i> —Report numbers of outcome events or summary measures                                                                                                                           | 9,10,19-23 |
| Main results             | 16  | (a) Give unadjusted estimates and, if applicable, confounder-adjusted estimates and their precision (eg, 95% confidence interval). Make clear which confounders were adjusted for and why they were included | 20-21      |
|                          |     | (b) Report category boundaries when continuous variables were categorized                                                                                                                                    | NA         |
|                          |     | (c) If relevant, consider translating estimates of relative risk into absolute risk for a meaningful time period                                                                                             | NA         |
| Other analyses           | 17  | Report other analyses done—eg analyses of subgroups and interactions, and sensitivity analyses                                                                                                               | 10,22-23   |
| <b>Discussion</b>        |     |                                                                                                                                                                                                              |            |
| Key results              | 18  | Summarise key results with reference to study objectives                                                                                                                                                     | 11         |
| Limitations              | 19  | Discuss limitations of the study, taking into account sources of potential bias or imprecision. Discuss both direction and magnitude of any potential bias                                                   | 14-15      |
| Interpretation           | 20  | Give a cautious overall interpretation of results considering objectives, limitations, multiplicity of analyses, results from similar studies, and other relevant evidence                                   | 11-14      |
| Generalisability         | 21  | Discuss the generalisability (external validity) of the study results                                                                                                                                        | 14         |
| <b>Other information</b> |     |                                                                                                                                                                                                              |            |
| Funding                  | 22  | Give the source of funding and the role of the funders for the present study and, if applicable, for the original study on which the present article is based                                                | NA         |

\*Give information separately for cases and controls in case-control studies and, if applicable, for exposed and unexposed groups in cohort and cross-sectional studies.

**Note:** An Explanation and Elaboration article discusses each checklist item and gives methodological background and published examples of transparent reporting. The STROBE checklist is best used in conjunction with this article (freely available on the Web sites of PLoS Medicine at <http://www.plosmedicine.org/>, Annals of Internal Medicine at <http://www.annals.org/>, and Epidemiology at <http://www.epidem.com/>). Information on the STROBE Initiative is available at [www.strobe-statement.org](http://www.strobe-statement.org).



**Predicting sleep disordered breathing in outpatients with suspected OSA**

|                                 |                                                                                                                                                                                                                                                                                                                                                                                                                                                                                                                                                                                                                                                                                                                                                                                       |
|---------------------------------|---------------------------------------------------------------------------------------------------------------------------------------------------------------------------------------------------------------------------------------------------------------------------------------------------------------------------------------------------------------------------------------------------------------------------------------------------------------------------------------------------------------------------------------------------------------------------------------------------------------------------------------------------------------------------------------------------------------------------------------------------------------------------------------|
| Journal:                        | <i>BMJ Open</i>                                                                                                                                                                                                                                                                                                                                                                                                                                                                                                                                                                                                                                                                                                                                                                       |
| Manuscript ID:                  | bmjopen-2013-004519.R1                                                                                                                                                                                                                                                                                                                                                                                                                                                                                                                                                                                                                                                                                                                                                                |
| Article Type:                   | Research                                                                                                                                                                                                                                                                                                                                                                                                                                                                                                                                                                                                                                                                                                                                                                              |
| Date Submitted by the Author:   | 07-Feb-2014                                                                                                                                                                                                                                                                                                                                                                                                                                                                                                                                                                                                                                                                                                                                                                           |
| Complete List of Authors:       | Cowan, Douglas; Glasgow Royal Infirmary, North Glasgow Sleep Service, Respiratory Department<br>Allardice, Gwen; University of Glasgow, West of Scotland Cancer Surveillance Unit<br>MacFarlane, Duncan; Gartnavel General Hospital, North Glasgow Sleep Service, Respiratory Department<br>Ramsay, Darren; Gartnavel General Hospital, North Glasgow Sleep Service, Respiratory Department<br>Ambler, Heather; Gartnavel General Hospital, North Glasgow Sleep Service, Respiratory Department<br>Banham, Stephen; Gartnavel General Hospital, North Glasgow Sleep Service, Respiratory Department<br>Livingston, Eric; Glasgow Royal Infirmary, North Glasgow Sleep Service, Respiratory Department<br>Carlin, Christopher; Gartnavel General Hospital, Sleep and Breathing Support |
| <b>Primary Subject Heading</b>: | Respiratory medicine                                                                                                                                                                                                                                                                                                                                                                                                                                                                                                                                                                                                                                                                                                                                                                  |
| Secondary Subject Heading:      | Respiratory medicine                                                                                                                                                                                                                                                                                                                                                                                                                                                                                                                                                                                                                                                                                                                                                                  |
| Keywords:                       | Sleep medicine < ANAESTHETICS, SLEEP MEDICINE, Adult thoracic medicine < THORACIC MEDICINE                                                                                                                                                                                                                                                                                                                                                                                                                                                                                                                                                                                                                                                                                            |
|                                 |                                                                                                                                                                                                                                                                                                                                                                                                                                                                                                                                                                                                                                                                                                                                                                                       |

SCHOLARONE™  
Manuscripts

1  
2  
3 **Predicting sleep disordered breathing in outpatients with**  
4  
5  
6 **suspected OSA**  
7  
8  
9

10  
11 **<sup>1</sup>Douglas C. Cowan BMedSci, MBChB, MRCP, PhD; <sup>2</sup>Gwen Allardice BSc,**  
12  
13 **MSc, PhD; <sup>1</sup>Duncan MacFarlane BSc; <sup>1</sup>Darren Ramsay BSc; <sup>1</sup>Heather**  
14 **Ambler; <sup>1</sup>Stephen Banham MBChB, MD, FRCP; <sup>1</sup>Eric Livingston BSc,**  
15 **MBChB, MD, FRCP; <sup>1</sup>Christopher Carlin BSc, MBChB, MRCP, PhD.**  
16  
17  
18  
19  
20  
21  
22  
23

24 **<sup>1</sup>North Glasgow Sleep Service, Gartnavel General Hospital and Glasgow Royal**  
25 **Infirmery, Glasgow, UK;**  
26  
27  
28

29 **<sup>2</sup>West of Scotland Cancer Surveillance Unit, University of Glasgow, Glasgow,**  
30 **UK.**  
31  
32  
33  
34  
35  
36  
37

38 ***Address for correspondence:***

39 Dr Douglas C Cowan,  
40  
41 Respiratory Department,  
42  
43 Glasgow Royal Infirmery,  
44  
45 16 Alexander Parade.  
46  
47  
48 Glasgow,  
49  
50 UK,  
51  
52 G31 2ER  
53  
54  
55

56  
57 Tel: +44 141 211 3482  
58  
59  
60



1  
2  
3 e-mail: [douglas.cowan@otago.ac.nz](mailto:douglas.cowan@otago.ac.nz)  
4

5 The Corresponding Author has the right to grant on behalf of all authors and does grant on behalf of all authors, an exclusive  
6 licence (or non-exclusive for government employees) on a worldwide basis to the BMJ Publishing Group Ltd and its  
7 Licensees to permit this article (if accepted) to be published in Thorax and any other BMJPGJ products to exploit all  
8 subsidiary rights, as set out in our licence  
9

10  
11 **Running title:** Prediction of Sleep Disordered Breathing  
12

13  
14 **Word count:** 3298  
15

16 **Key words:** Obstructive Sleep Apnoea, Sleep Disordered Breathing, Berlin Questionnaire,  
17 STOP-BANG questionnaire, prediction  
18

19  
20 Competing Interest: None to declare.  
21

22  
23 Additional unpublished data from this study is available on request by email.  
24

25  
26 There was no funding for this study.  
27

28  
29 This study was approved by the West of Scotland Regional Ethics Committee.  
30  
31  
32  
33  
34  
35  
36  
37  
38  
39  
40  
41  
42  
43  
44  
45  
46  
47  
48  
49  
50  
51  
52  
53  
54  
55  
56  
57  
58  
59  
60

**Abstract**

**Background:** Validated predictors of sleep disordered breathing (SDB) are required to streamline sleep services in the face of the obesity epidemic. Berlin, STOP and STOP-BANG questionnaires are useful in other settings, but their ability to predict obstructive sleep apnoea (OSA) in the sleep clinic population is unknown. We considered the utility of these questionnaires, other patient characteristics, co-morbidities, Epworth Sleepiness Scale (ESS), exhaled nitric oxide (F<sub>E</sub>NO) and blood markers for the prediction of SDB on limited polygraphy.

**Methods:** Data was obtained on 129 patients referred with possible OSA. We selected cut-points of apnoea hypopnoea index (AHI) of  $\geq 5$  and  $\geq 15$  per hour from their home polygraphy and determined associations of these with individual symptoms, questionnaire scores and other results. ROC analysis, univariate and multivariate logistic regression were used to explore these.

**Results:** AHI was  $\geq 5$  in 97 and  $\geq 15$  in 56 patients. STOP and STOP-BANG scores were associated with both AHI cut-points but results with ESS and Berlin Questionnaire scores were negative. STOP-BANG had a negative predictive value 1.00 (0.77-1.00) for an AHI  $\geq 15$  with a score  $\geq 3$  predicting AHI  $\geq 5$  with sensitivity 0.93 (95%CI 0.84-0.98) and accuracy 79%, whilst a score  $\geq 6$  predicted AHI  $\geq 15$  with specificity 0.78 (0.65-0.88) and accuracy 72%. Neck circumference  $\geq 17$ in and presence of witnessed apnoeas were independent predictors of SDB.

**Conclusions:** Both STOP and STOP-BANG questionnaires have utility for the prediction of SDB in the sleep clinic population. Modification of the STOP-BANG questionnaire merits further study in this and other patient groups.

(Word count 246)

1  
2  
3  
4  
5 Strengths and limitations of this study:  
6

7 Strengths:  
8

- 9  
10 • This is the first study to prospectively evaluate the utility of the Berlin, STOP and  
11 STOP-BANG questionnaires in the prediction of sleep disordered breathing in the  
12 population referred to a sleep service for assessment of possible obstructive sleep  
13 apnoea.  
14  
15 • This results of this study show that the STOP and STOP-BANG, but not the Berlin  
16 questionnaire, have utility for prediction of sleep disordered breathing in the sleep  
17 clinic population.  
18  
19  
20  
21  
22  
23  
24

25 Weaknesses:  
26

- 27  
28 • This study uses home unattended limited sleep studies rather than in-hospital attended  
29 full polysomnography, however this is considered standard clinical practice in the UK  
30 and is considered an acceptable method for diagnosis of OSA by the American  
31 Academy of Sleep Medicine.  
32  
33 • The sample size limits the conclusions that can be drawn from the multivariate  
34 analysis, however this was a secondary objective of the study.  
35  
36  
37  
38  
39  
40  
41  
42  
43  
44  
45  
46  
47  
48  
49  
50  
51  
52  
53  
54  
55  
56  
57  
58  
59  
60

## Introduction

Obstructive sleep apnoea syndrome (OSAS) is common with prevalence of approximately 4% in middle-aged men and 2% in middle-aged women.(1) Frequent partial (hypopnoea) or complete (apnoea) upper airway collapse during sleep leads to oxygen desaturation, increased respiratory effort, arousal and sleep fragmentation.(2) Patients typically present with witnessed apnoeas, loud snoring and excessive daytime somnolence.(3) The syndrome is associated with impaired quality of life,(4) cognitive functioning and work performance,(5) and with increased risk of road traffic accidents.(6) OSAS is considered an independent risk factor for hypertension,(7) and has associations with coronary disease, stroke, heart failure, arrhythmias,(8) metabolic syndrome(9) and type 2 diabetes.(10)

Despite the substantial burden of this disease, it is under-recognised. One study estimated that 93% of females and 82% of males with moderate-severe OSAS were not clinically diagnosed,(11) and more recent data support this finding.(12) Sleep studies are required for OSAS diagnosis but are expensive and not widely available.(3) Given the recent increases in childhood(13) and adulthood obesity,(14) the workload for sleep clinics and sleep laboratories will increase. Predictors of sleep disordered breathing (SDB) are required to allow recognition of OSAS, and prioritisation of investigations.

Several questionnaires have been designed to screen for SDB in different populations. The Berlin Questionnaire was first validated in primary care against portable unattended sleep studies and a “high risk” score predicted a respiratory disturbance index >5 with sensitivity 0.86, specificity 0.77, positive predictive value 0.89 and likelihood ratio 3.79.(15) It’s utilisation in other populations has been assessed with variable success.(16-22) The STOP and STOP-BANG Questionnaires were originally validated in surgical patients using in-

1  
2  
3 hospital attended polysomnography.(23) For prediction of apnoea hypopnoea index (AHI)  
4  
5 greater than 5, 15 and 30, sensitivities for the STOP and STOP-BANG questionnaires were  
6  
7 65.6, 74.3 and 79.5%, and 83.9, 92.9 and 100%, respectively. The Berlin and STOP  
8  
9 questionnaires have been compared in a cohort of surgical patients (24) and the STOP and  
10  
11 STOP-BANG questionnaires have been compared in a large study involving several distinct  
12  
13 cardiovascular and respiratory disease cohorts.(25) No study has, however, compared these  
14  
15 screening tools in a sleep service-referred population. Finally, because of rising obesity rates,  
16  
17 there is the potential for increasing recognition of SDB in primary care and in the face of this  
18  
19 evolution in sleep clinic practice it is therefore necessary to update and re-evaluate established  
20  
21 assessment tools.  
22  
23  
24

25  
26  
27 The objective of this study was, firstly, to compare utility of Berlin, STOP and STOP-BANG  
28  
29 questionnaires for prediction of SDB in a population referred to the sleep clinic for  
30  
31 assessment of possible OSA. Secondly, we sought to identify the most important variables  
32  
33 from these questionnaires and routine sleep clinic assessment that might be utilised in the  
34  
35 development of a composite predictive score for future use in this population.  
36  
37  
38  
39

#### 40 **Methods**

41  
42 This was a prospective observational study conducted May-December 2012. The protocol  
43  
44 was approved by the West of Scotland Research Ethics Committee. Study participants  
45  
46 received an information sheet and provided informed consent. .  
47  
48  
49

#### 50 *Participants*

51  
52 Consecutive patients aged  $\geq 16$  years referred to the North Glasgow Sleep Service (a tertiary  
53  
54 centre) for assessment of possible OSA were invited to participate.  
55  
56  
57  
58  
59  
60

### *Measurements*

Height, weight, body mass index (BMI), neck circumference, blood pressure and Epworth Sleepiness Scale (ESS)(26) were completed at the Sleep Clinic. Participants attended the Sleep Laboratory on a separate day so that a Sleep Physiologist could provide, and instruct on fitting, a sleep study device. On that occasion, relevant symptoms and co-morbidities were recorded, Mallampatti score was assessed, and the Berlin and STOP-BANG Questionnaires were completed. Blood samples including non-fasting lipid profile, glycated haemoglobin (HbA1c) and C-reactive protein (CRP) were taken. Two fractional exhaled nitric oxide (F<sub>E</sub>NO) measurements were taken using the NIOX MINO<sup>®</sup> (Aerocrine, Solna, Sweden), and the mean calculated.

### *Sleep Studies*

Unattended home limited polygraphy sleep studies were performed using the SOMNOmedics SOMNOscreen<sup>™</sup> kit (Randersacker, Germany) with channels that recorded body position, thoraco-abdominal movements, oronasal airflow, heart rate, pulse oximetry and snoring. Sleep study scoring by experienced Sleep Physiologists was in accordance with accepted guidelines.(27) An apnoea was defined as cessation of nasal flow for  $\geq 10$  seconds, whilst a hypnoea was defined as 50% reduction in nasal flow for  $\geq 10$  seconds, or lesser reduction in flow associated with oxygen desaturation of  $\geq 4\%$ .

### *The Epworth Sleepiness Scale (ESS), Berlin, STOP and STOP-BANG Questionnaires*

The ESS is a validated measure of daytime sleepiness including eight questions, each with four possible responses, that assesses the likelihood of dozing in different situations; a score of  $\geq 11/24$  denotes excessive daytime somnolence.(26) The Berlin Questionnaire includes

1  
2  
3 questions in three categories that relate firstly to snoring and witnessed apnoeas, secondly, to  
4  
5 tiredness, fatigue and sleepiness, and thirdly, to hypertension and obesity.(15) High risk of  
6  
7 OSA is defined by scoring positively in  $\geq 2$  categories. The STOP Questionnaire includes  
8  
9 four yes/no questions that relate to Snoring, Tiredness, Observed apnoeas and high blood  
10  
11 Pressure.(23) High risk of OSA is defined as a score of  $\geq 2$ . The STOP-BANG Questionnaire  
12  
13 includes four additional questions relating to BMI, Age, Neck circumference and Gender, and  
14  
15 high risk of OSA is defined as a score of  $\geq 3$ .(23)  
16  
17  
18  
19

### 20 21 *Statistical analyses*

22  
23 Statistical analyses were carried out using GraphPad Prism 5, IBM SPSS Statistics 19 and  
24  
25 STATA 12. Normality of data was checked using D'Agostino & Pearson omnibus normality  
26  
27 test. A priori, two cut-points were chosen for AHI:  $\geq 5$  events/hour (the standard cut-point  
28  
29 for the diagnosis of OSA),(28) and  $\geq 15$  events/hour, to predict significant SDB (the standard  
30  
31 cut-point for initiating continuous positive airway pressure [CPAP] therapy).(28) Groups  
32  
33 were compared using unpaired t-tests, Mann-Whitney tests and Fisher's Exact tests as  
34  
35 appropriate. Sensitivities, specificities, positive and negative predictive values, positive and  
36  
37 negative likelihood ratios, and overall accuracies were calculated for each of the  
38  
39 questionnaires for prediction of SDB as defined by AHI cut-points of  $\geq 5$  and  $\geq 15$ .  
40  
41 Associations between individual variables and each of the cut-points for AHI were explored  
42  
43 using univariate and multivariate logistic regression. For multivariate analysis, in a few cases  
44  
45 where BMI was known but neck circumference was not known, a value for the neck  
46  
47 circumference was imputed using linear regression with BMI as the independent value. This  
48  
49 allowed for a dataset of 116 cases with all of the variables known or imputed to be built to  
50  
51 identify independent variables for inclusion in a composite score. Receiver operating  
52  
53 characteristic (ROC) curve analysis was used to assess predictive value and an area under the  
54  
55  
56  
57  
58  
59  
60

1  
2  
3 curve (AUC)  $>0.7$  was considered clinically significant. Data are presented as mean  
4 (standard deviation), median (interquartile range) and proportion (percentage), unless stated  
5 otherwise. A p value  $<0.05$  was considered statistically significant.  
6  
7  
8  
9

## 10 11 12 **Results**

13  
14 150 subjects participated in this study, of which 129 had adequate sleep study data and were  
15 included in the analysis. AHI was  $\geq 5$  in 97/129 (75%) and  $\geq 15$  in 56/129 (43%). Overall, 82  
16 (64%) were male, mean(SD) age was 49(11) years, and median(IQR) BMI was 32(29-39)  
17  
18 kg/m<sup>2</sup>.  
19  
20  
21  
22  
23  
24

### 25 *Predicting SDB: Patient characteristics (See Table 1)*

26  
27 An AHI  $<5$  (“rule-out measurement”) was associated with female sex, younger age, lower  
28 weight and neck circumference, less frequently reported witnessed apnoeas, higher high  
29 density lipoprotein (HDL) cholesterol, and lower triglycerides, cholesterol/HDL and HbA1c.  
30  
31 An AHI  $\geq 15$  (“rule-in measurement”) was associated with male sex, obesity, higher weight,  
32 BMI and neck circumference, more frequently reported hypertension and witnessed apnoeas,  
33 lower HDL cholesterol, and higher triglycerides, cholesterol/HDL and HbA1c.  
34  
35  
36  
37  
38  
39  
40  
41  
42

### 43 *Predicting SDB: ESS, Berlin, STOP and STOP-BANG (See Tables 2, 3 and 4)*

44  
45 The ESS and Berlin questionnaire outcomes were not associated with either AHI cut-point.  
46  
47 An AHI $<5$  was associated with lower STOP and STOP-BANG scores, and fewer subjects  
48 being classified as “high risk” for OSA by both STOP and STOP-BANG questionnaires. An  
49 AHI $\geq 15$  was associated with higher STOP and STOP-BANG scores and more subjects being  
50 classified as “high risk” for OSA by the STOP-BANG questionnaire but not by the STOP  
51  
52  
53  
54  
55  
56  
57  
58  
59  
60  
questionnaire.



1  
2  
3  
4  
5 For the AHI cut-point of  $\geq 5$ , the Berlin, STOP, and STOP-BANG questionnaires had high  
6 sensitivities, moderate positive predictive values (PPV) and poor specificities and negative  
7 predictive values (NPV), for prediction of SDB. The STOP-BANG questionnaire performed  
8 best with an overall accuracy of 79%. For the AHI cut-point of  $\geq 15$ , the Berlin questionnaire  
9 had high sensitivity, but otherwise performed poorly. The STOP and STOP-BANG  
10 questionnaires had high sensitivities and NPVs. Again, the STOP-BANG questionnaire  
11 performed best, but with a low overall accuracy of 56%. The low negative likelihood ratios  
12 for the STOP and STOP-BANG questionnaires at both cut-points indicate that these  
13 questionnaires have value in excluding disease. As shown in table 4, the cut-points for  
14 STOP-BANG score that were associated with best overall accuracy were  $\geq 3$  and  $\geq 6$  for  
15 prediction of AHI  $\geq 5$  and  $\geq 15$ , respectively.  
16  
17  
18  
19  
20  
21  
22  
23  
24  
25  
26  
27  
28  
29  
30  
31

32 *SDB versus no SDB: Predictors and a composite score (See Tables 5 and 6 and Figure 1)*

33  
34 For the cut-point of AHI of  $\geq 5$ , univariate logistic regression showed significant associations  
35 for age, gender, weight, neck circumference, witnessed apnoeas, triglycerides and  
36 cholesterol/HDL ( $p < 0.05$ ). For the cut-point of  $\geq 15$ , significant associations were found for  
37 gender, weight, BMI, neck circumference, witnessed apnoeas, obesity, hypertension, FeNO  
38 and cholesterol/HDL ( $p < 0.05$ ). Multivariate logistic regression based on the significant  
39 variables from univariate logistic regression showed that for both cut-points neck  
40 circumference and witnessed apnoeas were independent predictors of SDB. For the cut-point  
41 of AHI of  $\geq 5$ , in a model incorporating neck circumference and witnessed apnoeas, the  
42 probability of SDB was 0.94 for individuals with neck circumference  $\geq 17$ in and witnessed  
43 apnoeas (sensitivity 84%, overall accuracy 77%, ROC AUC 0.768,  $p < 0.001$ ). For the cut-  
44 point of AHI  $\geq 15$ , the probability of SDB was 0.69 for individuals with neck circumference  
45  
46  
47  
48  
49  
50  
51  
52  
53  
54  
55  
56  
57  
58  
59  
60

1  
2  
3  $\geq 17$  in and witnessed apnoeas (specificity 80%, overall accuracy 69%, ROC AUC 0.722,  
4  
5  $p < 0.001$ ).

## 6 7 8 9 **Discussion**

10  
11 This is the first study to prospectively evaluate the utility of the Berlin, STOP and STOP-  
12  
13 BANG questionnaires in prediction of sleep disordered breathing in a population referred to a  
14  
15 tertiary sleep service for assessment of possible OSA. We found that in this population the  
16  
17 Berlin Questionnaire had no significant association with cut-points of  $\geq 5$  or  $\geq 15$  for AHI, but  
18  
19 that both the STOP and STOP-BANG scores were significantly associated with both cut-  
20  
21 points. The STOP-BANG Questionnaire had better performance for the prediction of OSA on  
22  
23 home sleep study, and different cut-points for STOP-BANG score could be selected  
24  
25 depending on preference to exclude SDB (score  $< 3$ ) or predict SDB (score  $\geq 6$ ). In addition,  
26  
27 we found notable associations between sleep study results and several patient characteristics.  
28  
29 In particular, neck circumference and witnessed apnoeas were found to be independent  
30  
31 predictors of SDB in our population.  
32  
33  
34  
35  
36  
37

38  
39 In our study, the Berlin Questionnaire was almost ubiquitously positive (116 of 125  
40  
41 participants had a positive result) and the positivity rate did not differ between those with and  
42  
43 without SDB. This was expected as this questionnaire was designed for primary care  
44  
45 assessment and our study population consisted of individuals referred from primary care with  
46  
47 symptoms suggestive of SDB. Our results indicate that the Berlin Questionnaire is not useful  
48  
49 in the prediction of SDB in the sleep clinic referral population and this is consistent with  
50  
51 previous reports.<sup>(19)</sup> The high sensitivities obtained for both AHI cut-points support  
52  
53 previous findings that the Berlin Questionnaire may have a role as a “rule-out” measurement  
54  
55  
56  
57  
58  
59  
60

1  
2  
3 in the primary care or screening setting(15, 17, 20, 24), though there have been some  
4  
5 conflicting results, suggesting it does not have adequate discriminatory power.(16, 22)  
6  
7

8  
9  
10 In our study Epworth Sleepiness Scale data indicated that two thirds of participants had  
11  
12 excessive daytime somnolence (ESS  $\geq 11$ ), however scores were similar in individuals with or  
13  
14 without SDB. Therefore, at least in the sleep clinic population, the ESS is not useful for the  
15  
16 prediction of SDB. It may be of value,perhaps combined with other measures, including  
17  
18 those highlighted in this study, in prediction of compliance with and benefit from OSA  
19  
20 treatment. Further research is required to address this question. Exhaled nitric oxide levels  
21  
22 were not significantly different between individuals with or without SDB whether defined by  
23  
24 an AHI cut-point of  $\geq 5$  or  $\geq 15$ . There is conflicting data in the literature regarding whether  
25  
26  $F_{E}NO$  is associated with SDB,(29-32) however our results suggest that it does not have utility  
27  
28 in prediction of SDB; further work is required to clarify this.  
29  
30  
31

32  
33  
34 We found that both the STOP and STOP-BANG questionnaires have utility in the prediction  
35  
36 of SDB in the sleep clinic population, and that STOP-BANG was superior, with higher  
37  
38 overall predictive accuracy. The STOP and STOP-BANG Questionnaires were developed  
39  
40 and validated in a surgical population using in-laboratory polysomnagraphy(23) and have  
41  
42 subsequently been studied in a cardiovascular disease population.(25) Our results are in  
43  
44 agreement with these two earlier studies as regards the increased predictive value of STOP-  
45  
46 BANG over STOP. In contrast to these earlier studies, however, we found sensitivities to be  
47  
48 higher and specificities to be lower for both cut-points of AHI. We suggest that of the two  
49  
50 AHI cut-points,  $\geq 15$  events/hr is the more important, being diagnostic of at least moderate  
51  
52 SDB and also an indication for CPAP treatment. At this cut-point, STOP and STOP-BANG  
53  
54 performed with high sensitivities and negative predictive values (STOP-BANG superior to  
55  
56  
57  
58  
59  
60

1  
2  
3 STOP) indicating that these questionnaires are more useful in excluding significant SDB.  
4  
5 This is further corroborated by the negative likelihood ratios of  $<0.2$  obtained for STOP and  
6  
7 STOP-BANG that also indicate that these questionnaires are most useful in ruling out SDB.  
8  
9 The STOP-BANG may be of value in the primary care setting, perhaps combined with type  
10  
11 IV portable monitoring sleep studies, to determine requirement for sleep clinic review and  
12  
13 more detailed polygraphy.  
14  
15

16  
17  
18 At the AHI cut-point of  $\geq 15$ , STOP-BANG had sensitivity and negative predictive value of  
19  
20 100%, and since this is the standard cut-point conventionally used to determine need for  
21  
22 CPAP,(28) we suggest that the STOP-BANG questionnaire is the preferred tool for prediction  
23  
24 of SDB in the sleep clinic setting of those currently available. STOP-BANG, perhaps with  
25  
26 modifications, merits further evaluation for the prediction of SDB in the sleep clinic  
27  
28 population and, more importantly, its utility in prediction of clinical outcomes including  
29  
30 treatment success should be assessed.  
31  
32

33  
34  
35 The original STOP-BANG questionnaire uses a cut-point of  $\geq 3$  to predict SDB.(23)  
36  
37 However, in our study we show that different cut-points can be selected depending on the  
38  
39 preference to rule-in or rule-out SDB. A score of  $\geq 3$  had the highest overall accuracy and a  
40  
41 sensitivity of 0.93 for the AHI cut-point of  $\geq 5$ , whereas a score of  $\geq 6$  had the highest overall  
42  
43 accuracy and a specificity of 0.78 for the AHI cut-point of  $\geq 15$ . Two other studies have  
44  
45 examined the usefulness of different cut-points for STOP-BANG score.(33-34) In the obese,  
46  
47 a score of  $\geq 3$  was associated with a sensitivity of 0.90 for predicting an AHI  $>5$ , whilst, a  
48  
49 score of  $\geq 6$  had a specificity of 0.88 for predicting an AHI  $>15$  and similar results have been  
50  
51 obtained in the morbidly obese(33) and in a surgical population.(34) Thus, in the sleep clinic  
52  
53 setting where the ultimate goal is to identify patients requiring CPAP, a higher cut-point for  
54  
55  
56  
57  
58  
59  
60

1  
2  
3 STOP-BANG may be preferred whereas in a primary care setting where the priority is not to  
4  
5 miss disease a lower cut-point may be chosen.  
6  
7

8  
9  
10 The STOP-BANG questionnaire is, however, still an imperfect tool for prediction of results  
11  
12 on home polygraphy. Accordingly, the secondary objective of our study was to identify  
13  
14 variables for inclusion in a locally developed composite score for future validation in the  
15  
16 sleep clinic and potentially wider population. Univariate analysis showed several significant,  
17  
18 expected associations for both cut-points of AHI. Using multivariate analysis, neck  
19  
20 circumference  $\geq 17$ in and the presence of witnessed apnoeas were independent predictors of  
21  
22 SDB. This is not a novel finding, but does support the robustness of our data. Particularly  
23  
24 when SDB was defined by an AHI cut-point of  $\geq 5$ , the regression model derived indicated a  
25  
26 high probability of SDB of 0.94 if both factors were present. The STOP-BANG  
27  
28 questionnaire, of course, includes both of these variables, and it is possible that adjustment of  
29  
30 the inclusion variables, or their weighting, might improve its performance. In future work, we  
31  
32 aim to validate a simple composite score based on these two variables in a modification of  
33  
34 STOP-BANG, to determine utility for predicting sleep study data and outcomes with  
35  
36 treatment.  
37  
38  
39  
40  
41  
42

43 Ultimately, a predictive tool that can be utilised in primary care is the goal. Our results  
44  
45 indicate low specificity of STOP-BANG, and therefore in its current form, if used in primary  
46  
47 care to identify patients requiring referral for further assessment, it is likely to result in a  
48  
49 significant percentage of patients being referred unnecessarily (false positives). It is hoped  
50  
51 that a modified STOP-BANG with improved specificity, while not compromising sensitivity,  
52  
53 may be developed that can be used safely in primary care for identification of patients  
54  
55 requiring referral to sleep services. Of upmost importance too is the prediction of treatment  
56  
57  
58  
59  
60

1  
2  
3 outcome. Non-adherence to CPAP treatment occurs in between 46 and 83%.(35-36)  
4  
5 Prediction of poor adherence by STOP-BANG or other similar tools would allow greater  
6  
7 attention to interventions to improve adherence in patients more likely to default from  
8  
9 treatment. The authors are not aware of any studies investigating this question and future  
10  
11 research should explore this important issue.  
12

13  
14  
15  
16 A possible limitation of our study was that SDB was characterised using home unattended  
17  
18 limited sleep studies rather than in-hospital attended full polysomnography. The latter is  
19  
20 considered the gold standard for diagnosis of SDB but is more expensive, less easily accessed  
21  
22 and potentially unrepresentative with sleep in an unfamiliar environment. Home unattended  
23  
24 and in-hospital attended sleep studies have previously been shown to produce similar results.  
25  
26 (37) Accordingly home testing with portable monitors is standard clinical practice in the UK,  
27  
28 and is now considered an acceptable method for diagnosis of OSA by the American Academy  
29  
30 of Sleep Medicine.(28) The sample size limits the conclusions that can be drawn from  
31  
32 multivariate analysis, however this was a secondary objective of the current study. It is  
33  
34 possible that variables predictive of SDB on univariate analysis in this cohort would have  
35  
36 been identified as independently predictive in multivariate models in a larger population. The  
37  
38 results of this study allow us, and potentially others, to focus future work to validate more  
39  
40 extensively the results obtained to date. We chose AHI cut-points of  $\geq 5$  and  $\geq 15$  to define  
41  
42 significant SDB. This was based on the consensus guideline produced by the Adult  
43  
44 Obstructive Sleep Apnea Task Force of the American Academy of Sleep Medicine that states  
45  
46 that diagnosis of OSA is based on a cut-point of  $>15$  events/hr or  $>5$  events/hr with relevant  
47  
48 symptoms, and that CPAP is indicated for treatment of moderate to severe OSA with  $\geq 15$   
49  
50 events/hr.(28) Although the cut-point of  $>30$  events/hr is consistent with severe OSA we  
51  
52 suggest that this cut-point is less clinically relevant from a diagnostic perspective or from that  
53  
54  
55  
56  
57  
58  
59  
60

1  
2  
3 of determining treatment. Finally, due to the prospective design of our study, we cannot  
4  
5 comment on the relative value of other tools developed for prediction of OSA such as the  
6  
7 Sleep Apnea Clinical Score (38) and American Society of Anesthesiologists Checklist. (39)  
8  
9 To compare their utility with that of the Berlin, STOP and STOP-BANG questionnaires in the  
10  
11 population referred to the sleep service would require a further study.  
12  
13

14  
15  
16 In conclusion, the Berlin Questionnaire was not useful in the prediction of SDB within our  
17  
18 sleep clinic population. The STOP-BANG questionnaire had superior predictive performance  
19  
20 to the STOP questionnaire at both cut-points of AHI ( $\geq 5$  and  $\geq 15$ ). A STOP-BANG score of  
21  
22  $\geq 3$  had the highest overall accuracy and a sensitivity of 0.93 for the prediction of an AHI $\geq 5$ ,  
23  
24 whilst a score of  $\geq 6$  had the highest overall accuracy and a specificity of 0.78 for the  
25  
26 prediction of an AHI  $\geq 15$ . Future work will validate a composite score including neck  
27  
28 circumference  $\geq 17$ in and the presence of witnessed apnoeas for the prediction of SDB in the  
29  
30 sleep clinic referral population. An optimised composite score could then be evaluated in  
31  
32 primary care and against treatment outcomes, with our overall aim being to provide required  
33  
34 tools for use in the expanded and consolidated sleep services that are now necessary given the  
35  
36 current obesity and OSA epidemics.  
37  
38  
39  
40  
41  
42  
43  
44  
45  
46  
47  
48  
49  
50  
51  
52  
53  
54  
55  
56  
57  
58  
59  
60

1  
2  
3  
4 **Funding:** There was no funding for this study.  
5

6 This study was approved by the West of Scotland Regional Ethics Committee.  
7  
8  
9

10  
11 **Contributorship Statement:**

12 Douglas Cowan took a leading role in study protocol development, study document  
13 development, application for ethics approval, data collection, statistical analysis and paper  
14 writing.  
15  
16  
17

18  
19 Gwen Allardice provided statistical support and performed part of the statistical analysis.  
20

21 Duncan MacFarlane, Darren Ramsay and Heather Ambler contributed to data collection, and  
22 carried out and scored sleep studies.  
23  
24

25  
26 Stephen Banham contributed to study protocol development.  
27

28 Eric Livingston contributed to study protocol development, study document development,  
29 application for ethics approval and paper writing.  
30  
31

32 Christopher Carlin contributed to study protocol development, data collection, statistical  
33 analysis and paper writing.  
34  
35

36  
37 All authors approved the final draft before submission.  
38

39 Christopher Carlin is responsible for the overall content as guarantor.  
40  
41

42 **Competing Interest:** None to declare.  
43

44 **Data Sharing Statement:** Additional unpublished data from this study is available on request  
45 by email.  
46  
47  
48  
49  
50  
51  
52  
53  
54  
55  
56  
57  
58  
59  
60



## References

1. Young T, Palta M, Dempsey J, et al. The occurrence of sleep-disordered breathing among middle-aged adults. *N Engl J Med*. 1993 ;**328**:1230-5.
2. Jordan AS, McSharry DG, Malhotra A. Adult obstructive sleep apnoea. *Lancet*. 2013; published online DOI:10.1016/S0140-6736(13)60734-5.
3. McNicholas WT. Diagnosis of obstructive sleep apnea in adults. *Proc Am Thorac Soc*. 2008;**5**:154-60.
4. Lacasse Y, Godbout C, Series F. Health-related quality of life in obstructive sleep apnoea. *Eur Respir J*. 2002;**19**:499-503.
5. Engleman HM, Douglas NJ. Sleep. 4: Sleepiness, cognitive function, and quality of life in obstructive sleep apnoea/hypopnoea syndrome. *Thorax*. 2004;**59**:618-22.
6. Teran-Santos J, Jimenez-Gomez A, Cordero-Guevara J. The association between sleep apnea and the risk of traffic accidents. Cooperative Group Burgos-Santander. *N Engl J Med*. 1999;**340**:847-51.
7. Robinson GV, Stradling JR, Davies RJ. Sleep . 6: obstructive sleep apnoea/hypopnoea syndrome and hypertension. *Thorax*. 2004;**59**:1089-94.
8. Lattimore JD, Celermajer DS, Wilcox I. Obstructive sleep apnea and cardiovascular disease. *J Am Coll Cardiol*. 2003;**41**:1429-37.
9. Svatikova A, Wolk R, Gami AS, et al. Interactions between obstructive sleep apnea and the metabolic syndrome. *Curr Diab Rep*. 2005;**5**:53-8.
10. Meslier N, Gagnadoux F, Giraud P, et al. Impaired glucose-insulin metabolism in males with obstructive sleep apnoea syndrome. *Eur Respir J*. 2003;**22**:156-60.
11. Young T, Evans L, Finn L, et al. Estimation of the clinically diagnosed proportion of sleep apnea syndrome in middle-aged men and women. *Sleep*. 1997;**20**:705-6.
12. Heffner JE, Rozenfeld Y, Kai M, et al. Prevalence of diagnosed sleep apnea among patients with type 2 diabetes in primary care. *Chest*. 2012;**141**:1414-21.
13. Wang Y, Lobstein T. Worldwide trends in childhood overweight and obesity. *Int J Pediatr Obes*. 2006;**1**:11-25.
14. Flegal KM, Carroll MD, Ogden CL, et al. Prevalence and trends in obesity among US adults, 1999-2000. *JAMA*. 2002;**288**:1723-7.
15. Netzer NC, Stoohs RA, Netzer CM, et al. Using the Berlin Questionnaire to identify patients at risk for the sleep apnea syndrome. *Ann Intern Med*. 1999;**131**:485-91.
16. Sert Kuniyoshi FH, Zellmer MR, Calvin AD, et al. Diagnostic accuracy of the Berlin Questionnaire in detecting sleep-disordered breathing in patients with a recent myocardial infarction. *Chest*. 2011;**140**:1192-7.
17. Best MW, Fitzpatrick M, Milev R, et al. Utility of the Berlin questionnaire for predicting obstructive sleep apnea in individuals with treatment-resistant depression. *Sleep Breath*. 2013; published online DOI:10.1007/s11325-013-0827-2.
18. Kang K, Park KS, Kim JE, et al. Usefulness of the Berlin Questionnaire to identify patients at high risk for obstructive sleep apnea: a population-based door-to-door study. *Sleep Breath*. 2013;**17**:803-10.
19. Ahmadi N, Chung SA, Gibbs A, et al. The Berlin questionnaire for sleep apnea in a sleep clinic population: relationship to polysomnographic measurement of respiratory disturbance. *Sleep Breath*. 2008;**12**:39-45.

- 1
  - 2
  - 3
  - 4
  - 5
  - 6
  - 7
  - 8
  - 9
  - 10
  - 11
  - 12
  - 13
  - 14
  - 15
  - 16
  - 17
  - 18
  - 19
  - 20
  - 21
  - 22
  - 23
  - 24
  - 25
  - 26
  - 27
  - 28
  - 29
  - 30
  - 31
  - 32
  - 33
  - 34
  - 35
  - 36
  - 37
  - 38
  - 39
  - 40
  - 41
  - 42
  - 43
  - 44
  - 45
  - 46
  - 47
  - 48
  - 49
  - 50
  - 51
  - 52
  - 53
  - 54
  - 55
  - 56
  - 57
  - 58
  - 59
  - 60
20. Bouloukaki I, Komninos ID, Mermigkis C, et al. Translation and validation of Berlin questionnaire in primary health care in Greece. *BMC Pulm Med.* 2013;**13**:6.
21. Saleh AB, Ahmad MA, Awadalla NJ. Development of Arabic version of Berlin questionnaire to identify obstructive sleep apnea at risk patients. *Ann Thorac Med.* 2011;**6**:212-6.
22. Sforza E, Chouchou F, Pichot V, et al. Is the Berlin questionnaire a useful tool to diagnose obstructive sleep apnea in the elderly? *Sleep Med.* 2011;**12**:142-6.
23. Chung F, Yegneswaran B, Liao P, et al. STOP questionnaire: a tool to screen patients for obstructive sleep apnea. *Anesthesiology.* 2008;**108**:812-21.
24. Chung F, Yegneswaran B, Liao P, et al. Validation of the Berlin questionnaire and American Society of Anesthesiologists checklist as screening tools for obstructive sleep apnea in surgical patients. *Anesthesiology.* 2008;**108**:822-30.
25. Silva GE, Vana KD, Goodwin JL, et al. Identification of patients with sleep disordered breathing: comparing the four-variable screening tool, STOP, STOP-Bang, and Epworth Sleepiness Scales. *J Clin Sleep Med.* 2011;**7**:467-72.
26. Johns MW. A new method for measuring daytime sleepiness: the Epworth sleepiness scale. *Sleep.* 1991;**14**:540-5.
27. Sleep-related breathing disorders in adults: recommendations for syndrome definition and measurement techniques in clinical research. The Report of an American Academy of Sleep Medicine Task Force. *Sleep.* 1999;**22**:667-89.
28. Epstein LJ, Kristo D, Strollo PJ, et al. Clinical guideline for the evaluation, management and long-term care of obstructive sleep apnea in adults. *J Clin Sleep Med.* 2009;**5**:263-76.
29. Chua AP, Aboussouan LS, Minai OA, et al. Long-term continuous positive airway pressure therapy normalizes high exhaled nitric oxide levels in obstructive sleep apnea. *J Clin Sleep Med.* 2013;**9**:529-35.
30. Fortuna AM, Miralda R, Calaf N, et al. Airway and alveolar nitric oxide measurements in obstructive sleep apnea syndrome. *Respir Med.* 2011;**105**:630-6.
31. Depalo A, Carpagnano GE, Spanevello A, et al. Exhaled NO and iNOS expression in sputum cells of healthy, obese and OSA subjects. *J Intern Med.* 2008;**263**:70-8.
32. Agustí AG, Barbe F, Togoeres B. Exhaled nitric oxide in patients with sleep apnea. *Sleep.* 1999;**22**:231-5.
33. Chung F, Yang Y, Liao P. Predictive Performance of the STOP-Bang Score for Identifying Obstructive Sleep Apnea in Obese Patients. *Obes Surg.* 2013; published online DOI:10.1007/s11695-013-1006-z.
34. Chung F, Subramanyam R, Liao P, et al. High STOP-Bang score indicates a high probability of obstructive sleep apnoea. *Br J Anaesth.* 2012;**108**:768-75.
35. Weaver TE, Grunstein RR. Adherence to continuous positive airway pressure therapy: the challenge to effective treatment. *Proc Am Thorac Soc.* 2008;**5**:173-8.
36. Wolkove N, Baltzan M, Kamel H, et al. Long-term compliance with continuous positive airway pressure in patients with obstructive sleep apnea. *Can Respir J.* 2008;**15**:365-9.
37. Iber C, Redline S, Kaplan Gilpin AM, et al. Polysomnography performed in the unattended home versus the attended laboratory setting--Sleep Heart Health Study methodology. *Sleep.* 2004;**27**:536-40.
38. Flemons WW, Whitelaw WA, Brant R, et al. Likelihood ratios for a sleep apnea clinical prediction rule. *Am J Respir Crit Care Med.* 1994;**150**:1279-85.
39. Gross JB, Bachenberg KL, Benumof JL, et al. Practice guidelines for the perioperative management of patients with obstructive sleep apnea: a report by the American Society of

1  
2  
3 Anesthesiologists Task Force on Perioperative Management of patients with obstructive sleep  
4 apnea. Anesthesiology. 2006 ;104:1081-93.  
5  
6  
7  
8  
9  
10  
11  
12  
13  
14  
15  
16  
17  
18  
19  
20  
21  
22  
23  
24  
25  
26  
27  
28  
29  
30  
31  
32  
33  
34  
35  
36  
37  
38  
39  
40  
41  
42  
43  
44  
45  
46  
47  
48  
49  
50  
51  
52  
53  
54  
55  
56  
57  
58  
59  
60

For peer review only

**Table 1:** Comparison of patient characteristics including anthropometric measurements, co-morbidities, symptoms, inflammatory markers, lipid profile and oximetry between groups without and with SDB as defined by AHI <5 events/hour and  $\geq 15$  events/hour.

|                                                          | <i>AHI&lt;5</i>      | <i>AHI<math>\geq</math>5</i> | <i>p</i>         | <i>AHI&lt;15</i>     | <i>AHI<math>\geq</math>15</i> | <i>P</i>         |
|----------------------------------------------------------|----------------------|------------------------------|------------------|----------------------|-------------------------------|------------------|
| <i>Male gender</i>                                       | <b>15/32 (47%)</b>   | <b>67/97 (69%)</b>           | <b>0.034</b>     | <b>38/73 (52%)</b>   | <b>44/56 (79%)</b>            | <b>0.003</b>     |
| <i>Age (yrs)</i>                                         | <b>44 (12)</b>       | <b>51 (11)</b>               | <b>0.004</b>     | 48 (13)              | 51 (9)                        | 0.103            |
| <i>Weight (kg)</i>                                       | <b>89 (19)</b>       | <b>101 (22)</b>              | <b>0.022</b>     | <b>92 (21)</b>       | <b>107 (20)</b>               | <b>0.001</b>     |
| <i>BMI (kg/m<sup>2</sup>)</i>                            | 31 (28-36)           | 33 (29-40)                   | 0.118            | <b>31 (27-36)</b>    | <b>34 (31-41)</b>             | <b>0.009</b>     |
| <i>Obesity (BMI<math>\geq</math>30 kg/m<sup>2</sup>)</i> | 18/28 (64%)          | 61/85 (72%)                  | 0.482            | <b>38/63 (60%)</b>   | <b>41/50 (82%)</b>            | <b>0.014</b>     |
| <i>Neck circumference (in)</i>                           | <b>15 (2)</b>        | <b>17(2)</b>                 | <b>&lt;0.001</b> | <b>16 (2)</b>        | <b>17 (1)</b>                 | <b>&lt;0.001</b> |
| <i>Neck circumference <math>\geq</math>17in</i>          | <b>4/22 (18%)</b>    | <b>45/76 (59%)</b>           | <b>0.001</b>     | <b>18/54 (33%)</b>   | <b>31/44 (70%)</b>            | <b>&lt;0.001</b> |
| <i>Mallampatti</i>                                       | 2 (1)                | 2 (1)                        | 0.192            | 2 (1)                | 2 (1)                         | 0.900            |
| <i>SBP (mmHg)</i>                                        | 134 (17)             | 136 (16)                     | 0.480            | 134 (15)             | 138 (18)                      | 0.194            |
| <i>DBP (mmHg)</i>                                        | 82 (11)              | 83 (9)                       | 0.528            | 81 (10)              | 85 (10)                       | 0.086            |
| <i>Diabetes</i>                                          | 2/32 (6%)            | 6/97 (6%)                    | 1.000            | 4/73 (5%)            | 4/56 (7%)                     | 0.727            |
| <i>Hypertension</i>                                      | 7/32 (22%)           | 36/97 (37%)                  | 0.134            | <b>18/73 (25%)</b>   | <b>25/56 (45%)</b>            | <b>0.024</b>     |
| <i>Hyperlipidaemia</i>                                   | 2/32 (6%)            | 18/97 (19%)                  | 0.156            | 10/73 (14%)          | 10/56 (18%)                   | 0.625            |
| <i>Loud snorer</i>                                       | 28/32 (88%)          | 92/97 (95%)                  | 0.224            | 65/73 (89%)          | 55/56 (98%)                   | 0.077            |
| <i>Witnessed apnoeas</i>                                 | <b>15/32 (47%)</b>   | <b>72/97 (74%)</b>           | <b>0.008</b>     | <b>40/73 (55%)</b>   | <b>47/56 (84%)</b>            | <b>&lt;0.001</b> |
| <i>Nocturia*</i>                                         | 11/32 (34%)          | 38/97 (39%)                  | 0.679            | 26/73 (36%)          | 23/56 (41%)                   | 0.585            |
| <i>Nocturnal wakenings*</i>                              | 18/32 (56%)          | 65/97 (67%)                  | 0.293            | 46/73 (63%)          | 37/56 (66%)                   | 0.853            |
| <i>Nocturnal choking</i>                                 | 15/32 (47%)          | 35/97 (36%)                  | 0.301            | 28/73 (38%)          | 22/56 (39%)                   | 1.000            |
| <i>Nocturnal gasping</i>                                 | 11/32 (34%)          | 38/97 (39%)                  | 0.679            | 26/73 (36%)          | 23/56 (41%)                   | 0.585            |
| <i>F<sub>e</sub>NO (ppb)</i>                             | 15 (12-25)           | 18 (12-26)                   | 0.595            | 15 (11-24)           | 19 (12-27)                    | 0.050            |
| <i>Cholesterol (mmol/L)</i>                              | 5.2 (1.1)            | 5.4 (1.0)                    | 0.431            | 5.3 (1.1)            | 5.4 (0.9)                     | 0.674            |
| <i>HDL cholesterol (mmol/L)</i>                          | <b>1.3 (1.0-1.5)</b> | <b>1.1 (1.0-1.3)</b>         | <b>0.008</b>     | <b>1.2 (1.0-1.4)</b> | <b>1.1 (1.0-1.2)</b>          | <b>0.016</b>     |
| <i>Triglycerides (mmol/L)</i>                            | <b>1.9 (1.0-2.5)</b> | <b>2.2 (1.5-3.2)</b>         | <b>0.015</b>     | <b>1.9 (1.3-2.9)</b> | <b>2.3 (1.6-3.2)</b>          | <b>0.042</b>     |
| <i>Cholesterol/HDL</i>                                   | <b>4.1 (3.3-5.0)</b> | <b>4.7 (3.8-5.7)</b>         | <b>0.011</b>     | <b>4.3 (3.5-5.6)</b> | <b>4.8 (4.0-5.8)</b>          | <b>0.022</b>     |
| <i>HbA1c (mmol/mol)</i>                                  | <b>34 (32-37)</b>    | <b>38 (36-41)</b>            | <b>0.001</b>     | <b>36 (33-39)</b>    | <b>38 (36-42)</b>             | <b>0.002</b>     |
| <i>CRP</i>                                               | 3.0 (1.2-8.5)        | 3.8 (1.4-7.5)                | 0.608            | 3.0 (1.3-7.6)        | 4.3 (1.4-8.6)                 | 0.173            |

Legend for Table 1: Data presented as mean (standard deviation), median (interquartile

range) or proportion (percentage) as appropriate. Significant differences in bold. \*  $\geq 2$ /night.

Abbreviations: BMI, body mass index; SBP, systolic blood pressure; DBP, diastolic blood pressure; F<sub>e</sub>NO, fraction of exhaled nitric oxide; HDL, high density lipoprotein; HbA1c, glycated haemoglobin; CRP, C-reactive protein; ODI, oxygen desaturation index; SpO<sub>2</sub>, oxygen saturation; SpO<sub>2</sub> t<90, duration of time for which oxygen saturation less than 90%.

**Table 2:** Comparison of results of Epworth Sleepiness Scale (ESS) and Berlin, STOP and STOP-BANG Questionnaires between groups without and with SDB as defined by AHI <5 events/hour and  $\geq 15$  events/hour.

|                                              | <i>AHI</i> <5      | <i>AHI</i> $\geq$ 5 | <i>p</i>         | <i>AHI</i> <15     | <i>AHI</i> $\geq$ 15 | <i>p</i>         |
|----------------------------------------------|--------------------|---------------------|------------------|--------------------|----------------------|------------------|
| <i>ESS score</i>                             | 13 (8-16)          | 13 (7-17)           | 0.845            | 13 (7-16)          | 13 (9-18)            | 0.476            |
| <i>ESS +ve (<math>\geq 11/24</math>)</i>     | 17/28 (61%)        | 63/92 (68%)         | 0.496            | 42/66 (64%)        | 38/54 (70%)          | 0.560            |
| <i>Berlin +ve</i>                            | 29/31 (94%)        | 87/94 (93%)         | 1.000            | 65/71 (92%)        | 51/54 (94%)          | 0.731            |
| <i>STOP score</i>                            | <b>2.5 (2-3)</b>   | <b>3 (2-3)</b>      | <b>0.011</b>     | <b>3 (2-3)</b>     | <b>3 (3-3.5)</b>     | <b>&lt;0.001</b> |
| <i>STOP +ve (<math>\geq 2/4</math>)</i>      | <b>27/32 (84%)</b> | <b>93/96 (97%)</b>  | <b>0.023</b>     | 66/73 (90%)        | 54/55 (98%)          | 0.137            |
| <i>STOP-BANG score</i>                       | <b>4 (2-5)</b>     | <b>5 (5-6)</b>      | <b>&lt;0.001</b> | <b>5 (2-5)</b>     | <b>6 (5-6)</b>       | <b>&lt;0.001</b> |
| <i>STOP-BANG +ve (<math>\geq 3/8</math>)</i> | <b>21/30 (70%)</b> | <b>88/93 (95%)</b>  | <b>&lt;0.001</b> | <b>54/68 (79%)</b> | <b>55/55 (100%)</b>  | <b>&lt;0.001</b> |

Legend for Table 2: Data presented as median (interquartile range) or proportion (percentage)

as appropriate. Significant differences in bold.

**Table 3:** Sensitivities, specificities, positive predictive values (PPV), negative predictive values (NPV), likelihood ratios positive (LR+), likelihood ratios negative (LR-), and overall accuracies of the Berlin, STOP and STOP-BANG Questionnaires for prediction of significant SDB as defined by: A: AHI  $\geq$ 5 events/hour; B: AHI  $\geq$ 15 events/hour.

A: Cut-point = AHI  $\geq$ 5 events/hour

|                  | <i>Sensitivity</i>  | <i>Specificity</i>  | <i>PPV</i>          | <i>NPV</i>          | <i>LR+</i> | <i>LR-</i> | <i>Accuracy</i> |
|------------------|---------------------|---------------------|---------------------|---------------------|------------|------------|-----------------|
| <i>Berlin</i>    | 0.93<br>(0.85-0.97) | 0.06<br>(0.01-0.21) | 0.75<br>(0.66-0.83) | 0.22<br>(0.03-0.60) | 0.99       | 1.15       | 71%             |
| <i>STOP</i>      | 0.97<br>(0.91-0.99) | 0.16<br>(0.05-0.33) | 0.78<br>(0.69-0.85) | 0.62<br>(0.24-0.91) | 1.15       | 0.20       | 77%             |
| <i>STOP-BANG</i> | 0.95<br>(0.88-0.98) | 0.30<br>(0.15-0.49) | 0.81<br>(0.72-0.88) | 0.64<br>(0.35-0.87) | 1.35       | 0.18       | 79%             |

B: Cut-point = AHI  $\geq$ 15 events/hour

|                  | <i>Sensitivity</i>  | <i>Specificity</i>  | <i>PPV</i>          | <i>NPV</i>          | <i>LR+</i> | <i>LR-</i> | <i>Accuracy</i> |
|------------------|---------------------|---------------------|---------------------|---------------------|------------|------------|-----------------|
| <i>Berlin</i>    | 0.94<br>(0.85-0.99) | 0.08<br>(0.03-0.17) | 0.44<br>(0.35-0.53) | 0.67<br>(0.30-0.92) | 1.03       | 0.66       | 46%             |
| <i>STOP</i>      | 0.98<br>(0.90-1.00) | 0.10<br>(0.04-0.19) | 0.45<br>(0.36-0.54) | 0.88<br>(0.47-1.00) | 1.09       | 0.19       | 48%             |
| <i>STOP-BANG</i> | 1.00<br>(0.94-1.00) | 0.21<br>(0.12-0.32) | 0.50<br>(0.41-0.60) | 1.00<br>(0.77-1.00) | 1.26       | 0.00       | 56%             |

Legend for Table 3: Data presented with 95% confidence intervals.

**Table 4:** Sensitivities, specificities, positive predictive values (PPV), negative predictive values (NPV), likelihood ratios positive (LR+), likelihood ratios negative (LR-), and overall accuracies of different cut-points of the STOP-BANG questionnaire for prediction of significant SDB as defined by: A: AHI  $\geq 5$  events/hour; B: AHI  $\geq 15$  events/hour.

A: Cut-point = AHI  $\geq 5$  events/hour

| <i>STOP-BANG cut-point (/8)</i> | <i>Proportion +ve SB</i> | <i>Sensitivity</i>  | <i>Specificity</i>  | <i>PPV</i>          | <i>NPV</i>          | <i>LR+</i> | <i>LR-</i> | <i>Accuracy</i> |
|---------------------------------|--------------------------|---------------------|---------------------|---------------------|---------------------|------------|------------|-----------------|
| $\geq 2$                        | 92/96                    | 0.99<br>(0.92-1.00) | 0.12<br>(0.03-0.32) | 0.77<br>(0.67-0.85) | 0.75<br>(0.19-0.99) | 1.13       | 0.11       | 77%             |
| $\geq 3$                        | 82/96                    | 0.93<br>(0.84-0.98) | 0.38<br>(0.19-0.59) | 0.82<br>(0.72-0.89) | 0.64<br>(0.35-0.87) | 1.49       | 0.18       | 79%             |
| $\geq 4$                        | 79/96                    | 0.90<br>(0.81-0.96) | 0.42<br>(0.22-0.63) | 0.82<br>(0.72-0.90) | 0.59<br>(0.33-0.82) | 1.55       | 0.23       | 78%             |
| $\geq 5$                        | 67/96                    | 0.81<br>(0.70-0.89) | 0.62<br>(0.41-0.81) | 0.87<br>(0.76-0.94) | 0.52<br>(0.32-0.71) | 2.15       | 0.31       | 76%             |
| $\geq 6$                        | 38/96                    | 0.46<br>(0.34-0.58) | 0.79<br>(0.58-0.93) | 0.87<br>(0.72-0.96) | 0.33<br>(0.21-0.46) | 2.20       | 0.68       | 54%             |
| $\geq 7$                        | 15/96                    | 0.18<br>(0.10-0.29) | 0.92<br>(0.73-0.99) | 0.87<br>(0.60-0.98) | 0.27<br>(0.18-0.38) | 2.17       | 0.89       | 36%             |
| 8                               | 5/96                     | 0.07<br>(0.02-0.15) | 1.00<br>(0.86-1.00) | 1.00<br>(0.48-1.00) | 0.26<br>(0.18-0.37) | -          | 0.93       | 30%             |

B: Cut-point = AHI  $\geq 15$  events/hour

| <i>STOP-BANG cut-point (/8)</i> | <i>Proportion +ve SB</i> | <i>Sensitivity</i>  | <i>Specificity</i>  | <i>PPV</i>          | <i>NPV</i>          | <i>LR+</i> | <i>LR-</i> | <i>Accuracy</i> |
|---------------------------------|--------------------------|---------------------|---------------------|---------------------|---------------------|------------|------------|-----------------|
| $\geq 2$                        | 92/96                    | 1.00<br>(0.91-1.00) | 0.07<br>(0.02-0.18) | 0.45<br>(0.34-0.55) | 1.00<br>(0.40-1.00) | 1.08       | 0          | 47%             |
| $\geq 3$                        | 82/96                    | 1.00<br>(0.91-1.00) | 0.25<br>(0.15-0.39) | 0.50<br>(0.39-0.61) | 1.00<br>(0.77-1.00) | 1.34       | 0          | 57%             |
| $\geq 4$                        | 79/96                    | 1.00<br>(0.91-1.00) | 0.31<br>(0.19-0.45) | 0.52<br>(0.40-0.63) | 1.00<br>(0.80-1.00) | 1.45       | 0          | 60%             |
| $\geq 5$                        | 67/96                    | 0.93<br>(0.80-0.98) | 0.47<br>(0.34-0.61) | 0.57<br>(0.44-0.69) | 0.90<br>(0.73-0.98) | 1.76       | 0.15       | 67%             |
| $\geq 6$                        | 38/96                    | 0.63<br>(0.47-0.78) | 0.78<br>(0.65-0.88) | 0.68<br>(0.51-0.82) | 0.74<br>(0.61-0.85) | 2.91       | 0.47       | 72%             |
| $\geq 7$                        | 15/96                    | 0.22<br>(0.11-0.38) | 0.89<br>(0.78-0.96) | 0.60<br>(0.32-0.84) | 0.60<br>(0.49-0.71) | 2.01       | 0.88       | 60%             |
| 8                               | 5/96                     | 0.10<br>(0.03-0.23) | 0.98<br>(0.90-1.00) | 0.80<br>(0.28-0.99) | 0.59<br>(0.48-0.70) | 5.36       | 0.92       | 60%             |

Legend for Table 4: Data presented with 95% confidence intervals. Abbreviations: SB,

STOP-BANG.

**Table 5:** Probabilities of SDB using a composite score based on neck circumference ( $\geq 17$ in or  $< 17$ in) and presence (1) or absence (0) of witnessed apnoeas derived from logistic regression models. SDB defined by: A: AHI  $\geq 5$  events/hour; B: AHI  $\geq 15$  events/hour.

A: Cut-point = AHI  $\geq 5$  events/hour

| <i>Neck Circumference (in)</i> | <i>Witnessed Apnoeas</i> |          |
|--------------------------------|--------------------------|----------|
|                                | <i>0</i>                 | <i>1</i> |
| <i>&lt;17</i>                  | 0.47                     | 0.75     |
| <i><math>\geq 17</math></i>    | 0.83                     | 0.94     |

B: Cut-point = AHI  $\geq 15$  events/hour

| <i>Neck Circumference (in)</i> | <i>Witnessed Apnoeas</i> |          |
|--------------------------------|--------------------------|----------|
|                                | <i>0</i>                 | <i>1</i> |
| <i>&lt;17</i>                  | 0.17                     | 0.40     |
| <i><math>\geq 17</math></i>    | 0.40                     | 0.69     |



**Table 6:** Sensitivities, specificities, positive predictive values (PPV), negative predictive values (NPV), and overall accuracies of logistic models for prediction of SDB as defined by:

A: AHI  $\geq 5$  events/hour; predict SDB *unless* neck  $< 17$ in *and* witnessed apnoeas absent; B:

AHI  $\geq 15$  events/hour; predict SDB *only if* neck  $\geq 17$ in *and* witnessed apnoeas present.

| <i>Model</i> | <i>Sensitivity</i>  | <i>Specificity</i>  | <i>PPV</i>          | <i>NPV</i>          | <i>Accuracy</i> |
|--------------|---------------------|---------------------|---------------------|---------------------|-----------------|
| A            | 0.84<br>(0.75-0.91) | 0.54<br>(0.34-0.72) | 0.85<br>(0.76-0.92) | 0.52<br>(0.32-0.71) | 77%             |
| B            | 0.56<br>(0.41-0.70) | 0.80<br>(0.68-0.89) | 0.69<br>(0.53-0.82) | 0.69<br>(0.57-0.79) | 69%             |

Legend for Table 6: Data presented with 95% confidence intervals.

1  
2  
3 **Figure 1:** ROC curves of logistic models for prediction of SDB as defined by: Model A: AHI  
4  $\geq 5$  events/hour; predict SDB *unless* neck  $< 17$ in *and* witnessed apnoeas absent; Model B: AHI  
5  $\geq 15$  events/hour; predict SDB *only if* neck  $\geq 17$ in *and* witnessed apnoeas present.  
6  
7  
8  
9  
10  
11  
12  
13  
14  
15  
16  
17  
18  
19  
20  
21  
22  
23  
24  
25  
26  
27  
28  
29  
30  
31  
32  
33  
34  
35  
36  
37  
38  
39  
40  
41  
42  
43  
44  
45  
46  
47  
48  
49  
50  
51  
52  
53  
54  
55  
56  
57  
58  
59  
60

For peer review only

1  
2  
3 **Predicting sleep disordered breathing in outpatients with**  
4  
5  
6 **suspected OSA**  
7  
8  
9

10  
11 **<sup>1</sup>Douglas C. Cowan BMedSci, MBChB, MRCP, PhD; <sup>2</sup>Gwen Allardice BSc,**  
12  
13 **MSc, PhD; <sup>1</sup>Duncan MacFarlane BSc; <sup>1</sup>Darren Ramsay BSc; <sup>1</sup>Heather**  
14 **Ambler; <sup>1</sup>Stephen Banham MBChB, MD, FRCP; <sup>1</sup>Eric Livingston BSc,**  
15 **MBChB, MD, FRCP; <sup>1</sup>Christopher Carlin BSc, MBChB, MRCP, PhD.**  
16  
17  
18  
19  
20  
21  
22  
23

24 **<sup>1</sup>North Glasgow Sleep Service, Gartnavel General Hospital and Glasgow Royal**  
25 **Infirmery, Glasgow, UK;**  
26  
27  
28

29 **<sup>2</sup>West of Scotland Cancer Surveillance Unit, University of Glasgow, Glasgow,**  
30 **UK.**  
31  
32  
33  
34  
35  
36

37 ***Address for correspondence:***

38 Dr Douglas C Cowan,  
39  
40 Respiratory Department,  
41  
42 Glasgow Royal Infirmery,  
43  
44 16 Alexander Parade.  
45  
46  
47 Glasgow,  
48  
49 UK,  
50  
51 G31 2ER  
52  
53  
54

55  
56  
57 Tel: +44 141 211 3482  
58  
59  
60

1  
2  
3 e-mail: [douglas.cowan@otago.ac.nz](mailto:douglas.cowan@otago.ac.nz)  
4

5 The Corresponding Author has the right to grant on behalf of all authors and does grant on behalf of all authors, an exclusive  
6 licence (or non-exclusive for government employees) on a worldwide basis to the BMJ Publishing Group Ltd and its  
7 Licensees to permit this article (if accepted) to be published in Thorax and any other BMJPGJL products to exploit all  
8 subsidiary rights, as set out in our licence  
9

10  
11 **Running title:** Prediction of Sleep Disordered Breathing  
12

13  
14 **Word count:** 29973298  
15

16 **Key words:** Obstructive Sleep Apnoea, Sleep Disordered Breathing, Berlin Questionnaire,  
17 STOP-BANG questionnaire, prediction  
18

19  
20 Competing Interest: None to declare.  
21

22  
23 Additional unpublished data from this study is available on request by email.  
24

25  
26 There was no funding for this study.  
27

28  
29 This study was approved by the West of Scotland Regional Ethics Committee.  
30  
31  
32  
33  
34  
35  
36  
37  
38  
39  
40  
41  
42  
43  
44  
45  
46  
47  
48  
49  
50  
51  
52  
53  
54  
55  
56  
57  
58  
59  
60

## Abstract

**Background:** Validated predictors of sleep disordered breathing (SDB) are required to streamline sleep services in the face of the obesity epidemic. Berlin, STOP and STOP-BANG questionnaires are useful in other settings, but their ability to predict obstructive sleep apnoea (OSA) in the sleep clinic population is unknown. We considered the utility of these questionnaires, other patient characteristics, co-morbidities, Epworth Sleepiness Scale (ESS), exhaled nitric oxide (F<sub>E</sub>NO) and blood markers for the prediction of SDB on limited polygraphy.

**Methods:** Data was obtained on 129 patients referred with possible OSA. We selected cut-points of apnoea hypopnoea index (AHI) of  $\geq 5$  and  $\geq 15$  per hour from their home polygraphy and determined associations of these with individual symptoms, questionnaire scores and other results. ROC analysis, univariate and multivariate logistic regression were used to explore these.

**Results:** AHI was  $\geq 5$  in 97 and  $\geq 15$  in 56 patients. STOP and STOP-BANG scores were associated with both AHI cut-points but results with ESS and Berlin Questionnaire scores were negative. STOP-BANG had a negative predictive value 1.00 (0.77-1.00) for an AHI  $\geq 15$  with a score  $\geq 3$  predicting AHI  $\geq 5$  with sensitivity 0.93 (95%CI 0.84-0.98) and accuracy 79%, whilst a score  $\geq 6$  predicted AHI  $\geq 15$  with specificity 0.78 (0.65-0.88) and accuracy 72%. Neck circumference  $\geq 17$ in and presence of witnessed apnoeas were independent predictors of SDB.

**Conclusions:** Both STOP and STOP-BANG questionnaires have utility for the prediction of SDB in the sleep clinic population. Modification of the STOP-BANG questionnaire merits further study in this and other patient groups.

(Word count 246)

1  
2  
3  
4  
5 Strengths and limitations of this study:  
6

7 Strengths:  
8

- 9
- 10 • This is the first study to prospectively evaluate the utility of the Berlin, STOP and  
11 STOP-BANG questionnaires in the prediction of sleep disordered breathing in the  
12 population referred to a sleep service for assessment of possible obstructive sleep  
13 apnoea.  
14
  - 15 • This results of this study show that the STOP and STOP-BANG, but not the Berlin  
16 questionnaire, have utility for prediction of sleep disordered breathing in the sleep  
17 clinic population.  
18  
19  
20  
21  
22  
23  
24

25 Weaknesses:  
26

- 27 • This study uses home unattended limited sleep studies rather than in-hospital attended  
28 full polysomnography, however this is considered standard clinical practice in the UK  
29 and is considered an acceptable method for diagnosis of OSA by the American  
30 Academy of Sleep Medicine.  
31  
32
- 33 • The sample size limits the conclusions that can be drawn from the multivariate  
34 analysis, however this was a secondary objective of the study.  
35  
36  
37  
38  
39  
40  
41  
42  
43  
44  
45  
46  
47  
48  
49  
50  
51  
52  
53  
54  
55  
56  
57  
58  
59  
60

## Introduction

Obstructive sleep apnoea syndrome (OSAS) is common with prevalence of approximately 4% in middle-aged men and 2% in middle-aged women.(1) Frequent partial (hypopnoea) or complete (apnoea) upper airway collapse during sleep leads to oxygen desaturation, increased respiratory effort, arousal and sleep fragmentation.(2) Patients typically present with witnessed apnoeas, loud snoring and excessive daytime somnolence.(3) The syndrome is associated with impaired quality of life,(4) cognitive functioning and work performance,(5) and with increased risk of road traffic accidents.(6) OSAS is considered an independent risk factor for hypertension,(7) and has associations with coronary disease, stroke, heart failure, arrhythmias,(8) metabolic syndrome(9) and type 2 diabetes.(10)

Despite the substantial burden of this disease, it is under-recognised. One study estimated that 93% of females and 82% of males with moderate-severe OSAS were not clinically diagnosed,(11) and more recent data support this finding.(12) Sleep studies are required for OSAS diagnosis but are expensive and not widely available.(3) Given the recent increases in childhood(13) and adulthood obesity,(14) the workload for sleep clinics and sleep laboratories will increase. Predictors of sleep disordered breathing (SDB) are required to allow recognition of OSAS, and prioritisation of investigations.

Several questionnaires have been designed to screen for SDB in different populations. The Berlin Questionnaire was first validated in primary care against portable unattended sleep studies and a “high risk” score predicted a respiratory disturbance index >5 with sensitivity 0.86, specificity 0.77, positive predictive value 0.89 and likelihood ratio 3.79.(15) It’s utilisation in other populations has been assessed with variable success.(16-22) The STOP and STOP-BANG Questionnaires were originally validated in surgical patients using in-

1  
2  
3 hospital attended polysomnography.(23) For prediction of apnoea hypopnoea index (AHI)  
4  
5 greater than 5, 15 and 30, sensitivities for the STOP and STOP-BANG questionnaires were  
6  
7 65.6, 74.3 and 79.5%, and 83.9, 92.9 and 100%, respectively. The Berlin and STOP  
8  
9 questionnaires have been compared in a cohort of surgical patients (24) and the STOP and  
10  
11 STOP-BANG questionnaires have been compared in a large study involving several distinct  
12  
13 cardiovascular and respiratory disease cohorts.(25) No study has, however, compared these  
14  
15 screening tools in a sleep service-referred population. ~~Finally, because of~~ ~~Also, along with~~  
16  
17 ~~changes in the population (i.e. rising obesity rates, )~~ there is the potential for increasing  
18  
19 recognition of SDB in primary care; ~~so and in the face of this evolution in sleep clinic practice~~  
20  
21 it is therefore necessary to update and re-evaluate established assessment tools ~~in the face of~~  
22  
23 ~~the evolution in sleep clinic practice.~~  
24  
25  
26  
27  
28

29  
30 The objective of this study was, firstly, to compare utility of Berlin, STOP and STOP-BANG  
31  
32 questionnaires for prediction of SDB in a population referred to the sleep clinic for  
33  
34 assessment of possible OSA. Secondly, we sought to identify the most important variables  
35  
36 from these questionnaires and routine sleep clinic assessment that might be utilised in the  
37  
38 development of a composite predictive score for future use in this population.  
39  
40  
41  
42

### 43 **Methods**

44  
45 This was a prospective observational study conducted May-December 2012. The protocol  
46  
47 was approved by the West of Scotland Research Ethics Committee. Study participants  
48  
49 received an information sheet and provided informed consent. .  
50  
51  
52  
53

### 54 *Participants*

55  
56  
57  
58  
59  
60



1  
2  
3 Consecutive patients aged  $\geq 16$  years referred to the North Glasgow Sleep Service (a tertiary  
4  
5 centre) for assessment of possible OSA were invited to participate.  
6  
7

### 8 9 *Measurements*

10  
11 Height, weight, body mass index (BMI), neck circumference, blood pressure and Epworth  
12  
13 Sleepiness Scale (ESS)(26) were completed at the Sleep Clinic. Participants attended the  
14  
15 Sleep Laboratory on a separate day so that a Sleep Physiologist could provide, and instruct on  
16  
17 fitting, a sleep study device. On that occasion, relevant symptoms and co-morbidities were  
18  
19 recorded, Mallampatti score was assessed, and the Berlin and STOP-BANG Questionnaires  
20  
21 were completed. Blood samples including non-fasting lipid profile, glycated haemoglobin  
22  
23 (HbA1c) and C-reactive protein (CRP) were taken. Two fractional exhaled nitric oxide  
24  
25 ( $F_{E}NO$ ) measurements were taken using the NIOX MINO<sup>®</sup> (Aerocrine, Solna, Sweden), and  
26  
27 the mean calculated.  
28  
29  
30  
31  
32

### 33 34 *Sleep Studies*

35  
36 Unattended home limited polygraphy sleep studies were performed using the SOMNOmedics  
37  
38 SOMNOscreen<sup>™</sup> kit (Randersacker, Germany) with channels that recorded body position,  
39  
40 thoraco-abdominal movements, oronasal airflow, heart rate, pulse oximetry and snoring.  
41  
42 Sleep ~~studies~~-study scoring by experienced Sleep Physiologists was in accordance with  
43  
44 accepted guidelines.(27) An apnoea was defined as cessation of nasal flow for  $\geq 10$  seconds,  
45  
46 whilst a hypnoea was defined as 50% reduction in nasal flow for  $\geq 10$  seconds, or lesser  
47  
48 reduction in flow associated with oxygen desaturation of  $\geq 4\%$ .  
49  
50  
51  
52  
53

### 54 55 *The Epworth Sleepiness Scale (ESS), Berlin, STOP and STOP-BANG Questionnaires*

56  
57  
58  
59  
60

1  
2  
3 The ESS is a validated measure of daytime sleepiness including eight questions, each with  
4 four possible responses, that assesses the likelihood of dozing in different situations; a score  
5 of  $\geq 11/24$  denotes excessive daytime somnolence.(26) The Berlin Questionnaire includes  
6 questions in three categories that relate firstly to snoring and witnessed apnoeas, secondly, to  
7 tiredness, fatigue and sleepiness, and thirdly, to hypertension and obesity.(15) High risk of  
8 OSA is defined by scoring positively in  $\geq 2$  categories. The STOP Questionnaire includes  
9 four yes/no questions that relate to Snoring, Tiredness, Observed apnoeas and high blood  
10 Pressure.(23) High risk of OSA is defined as a score of  $\geq 2$ . The STOP-BANG Questionnaire  
11 includes four additional questions relating to BMI, Age, Neck circumference and Gender, and  
12 high risk of OSA is defined as a score of  $\geq 3$ .(23)  
13  
14  
15  
16  
17  
18  
19  
20  
21  
22  
23  
24  
25  
26

### 27 *Statistical analyses*

28  
29 Statistical analyses were carried out using GraphPad Prism 5, IBM SPSS Statistics 19 and  
30 STATA 12. Normality of data was checked using D'Agostino & Pearson omnibus normality  
31 test. A priori, two cut-points were chosen for AHI:  $\geq 5$  events/hour (the standard cut-point  
32 for the diagnosis of OSA),(28) and  $\geq 15$  events/hour, to predict significant SDB (the standard  
33 cut-point for initiating continuous positive airway pressure [CPAP] therapy).(28) Groups  
34 were compared using unpaired t-tests, Mann-Whitney tests and Fisher's Exact tests as  
35 appropriate. Sensitivities, specificities, positive and negative predictive values, positive and  
36 negative likelihood ratios, and overall accuracies were calculated for each of the  
37 questionnaires for prediction of SDB as defined by AHI cut-points of  $\geq 5$  and  $\geq 15$ .  
38 Associations between individual variables and each of the cut-points for AHI were explored  
39 using univariate and multivariate logistic regression. For multivariate analysis, in a few cases  
40 where BMI was known but neck circumference was not known, a value for the neck  
41 circumference was imputed using linear regression with BMI as the independent value. This  
42  
43  
44  
45  
46  
47  
48  
49  
50  
51  
52  
53  
54  
55  
56  
57  
58  
59  
60

1  
2  
3 allowed for a dataset of 116 cases with all of the variables known or imputed to be built to  
4 identify independent variables for inclusion in a composite score. Receiver operating  
5 characteristic (ROC) curve analysis was used to assess predictive value and an area under the  
6 curve (AUC)  $>0.7$  was considered clinically significant. Data are presented as mean  
7 (standard deviation), median (interquartile range) and proportion (percentage), unless stated  
8 otherwise. A p value  $<0.05$  was considered statistically significant.  
9  
10  
11  
12  
13  
14  
15  
16  
17

## 18 **Results**

19  
20 150 subjects participated in this study, of which 129 had adequate sleep study data and were  
21 included in the analysis. AHI was  $\geq 5$  in 97/129 (75%) and  $\geq 15$  in 56/129 (43%). Overall, 82  
22 (64%) were male, mean(SD) age was 49(11) years, and median(IQR) BMI was 32(29-39)  
23 kg/m<sup>2</sup>.  
24  
25  
26  
27  
28  
29  
30  
31

### 32 *Predicting SDB: Patient characteristics (See Table 1)*

33  
34 An AHI  $<5$  (“rule-out measurement”) was associated with female sex, younger age, lower  
35 weight and neck circumference, less frequently reported witnessed apnoeas, higher high  
36 density lipoprotein (HDL) cholesterol, and lower triglycerides, cholesterol/HDL and HbA1c.  
37  
38 An AHI  $\geq 15$  (“rule-in measurement”) was associated with male sex, obesity, higher weight,  
39 BMI and neck circumference, more frequently reported hypertension and witnessed apnoeas,  
40 lower HDL cholesterol, and higher triglycerides, cholesterol/HDL and HbA1c.  
41  
42  
43  
44  
45  
46  
47  
48

### 49 *Predicting SDB: ESS, Berlin, STOP and STOP-BANG (See Tables 2, 3 and 4)*

50  
51 The ESS and Berlin questionnaire outcomes were not associated with either AHI cut-point.  
52  
53 An AHI $<5$  was associated with lower STOP and STOP-BANG scores, and fewer subjects  
54 being classified as “high risk” for OSA by both STOP and STOP-BANG questionnaires. An  
55  
56  
57  
58  
59  
60

1  
2  
3 AHI $\geq$ 15 was associated with higher STOP and STOP-BANG scores and more subjects being  
4 classified as “high risk” for OSA by the STOP-BANG questionnaire but not by the STOP  
5  
6  
7 questionnaire.  
8  
9

10  
11 For the AHI cut-point of  $\geq$ 5, the Berlin, STOP, and STOP-BANG questionnaires had high  
12 sensitivities, moderate positive predictive values (PPV) and poor specificities and negative  
13 predictive values (NPV), for prediction of SDB. The STOP-BANG questionnaire performed  
14 best with an overall accuracy of 79%. For the AHI cut-point of  $\geq$ 15, the Berlin questionnaire  
15 had high sensitivity, but otherwise performed poorly. The STOP and STOP-BANG  
16 questionnaires had high sensitivities and NPVs. Again, the STOP-BANG questionnaire  
17 performed best, but with a low overall accuracy of 56%. The low negative likelihood ratios  
18 for the STOP and STOP-BANG questionnaires at both cut-points indicate that these  
19 questionnaires have value in excluding disease. As shown in table 4, the cut-points for  
20 STOP-BANG score that were associated with best overall accuracy were  $\geq$ 3 and  $\geq$ 6 for  
21 prediction of AHI  $\geq$ 5 and  $\geq$ 15, respectively.  
22  
23  
24  
25  
26  
27  
28  
29  
30  
31  
32  
33  
34  
35  
36  
37

38 *SDB versus no SDB: Predictors and a composite score (See Tables 5 and 6 and Figure 1)*

39  
40 For the cut-point of AHI of  $\geq$ 5, univariate logistic regression showed significant associations  
41 for age, gender, weight, neck circumference, witnessed apnoeas, triglycerides and  
42 cholesterol/HDL ( $p<0.05$ ). For the cut-point of  $\geq$ 15, significant associations were found for  
43 gender, weight, BMI, neck circumference, witnessed apnoeas, obesity, hypertension, FeNO  
44 and cholesterol/HDL ( $p<0.05$ ). Multivariate logistic regression based on the significant  
45 variables from univariate logistic regression showed that for both cut-points neck  
46 circumference and witnessed apnoeas were independent predictors of SDB. For the cut-point  
47 of AHI of  $\geq$ 5, in a model incorporating neck circumference and witnessed apnoeas, the  
48  
49  
50  
51  
52  
53  
54  
55  
56  
57  
58  
59  
60

1  
2  
3 probability of SDB was 0.94 for individuals with neck circumference  $\geq 17$ in and witnessed  
4 apnoeas (sensitivity 84%, overall accuracy 77%, ROC AUC 0.768,  $p < 0.001$ ). For the cut-  
5 point of AHI  $\geq 15$ , the probability of SDB was 0.69 for individuals with neck circumference  
6  $\geq 17$ in and witnessed apnoeas (specificity 80%, overall accuracy 69%, ROC AUC 0.722,  
7  $p < 0.001$ ).

## 16 Discussion

17  
18 This is the first study to prospectively evaluate the utility of the Berlin, STOP and STOP-  
19 BANG questionnaires in prediction of sleep disordered breathing in a population referred to a  
20 tertiary sleep service for assessment of possible OSA. We found that in this population the  
21 Berlin Questionnaire had no significant association with cut-points of  $\geq 5$  or  $\geq 15$  for AHI, but  
22 that both the STOP and STOP-BANG scores were significantly associated with both cut-  
23 points. The STOP-BANG Questionnaire had better performance for the prediction of OSA on  
24 home sleep study, and different cut-points for STOP-BANG score could be selected  
25 depending on preference to exclude SDB (score  $< 3$ ) or predict SDB (score  $\geq 6$ ). In addition,  
26 we found notable associations between sleep study results and several patient characteristics.  
27 In particular, neck circumference and witnessed apnoeas were found to be independent  
28 predictors of SDB in our population.

29  
30  
31  
32  
33  
34  
35  
36  
37  
38  
39  
40  
41  
42  
43  
44  
45 In our study, the Berlin Questionnaire was almost ubiquitously positive (116 of 125  
46 participants had a positive result) and the positivity rate did not differ between those with and  
47 without SDB. This was expected as this questionnaire was designed for primary care  
48 assessment and our study population consisted of individuals referred from primary care with  
49 symptoms suggestive of SDB. Our results indicate that the Berlin Questionnaire is not useful  
50 in the prediction of SDB in the sleep clinic referral population and this is consistent with  
51  
52  
53  
54  
55  
56  
57  
58  
59  
60

1  
2  
3 previous reports.(19) ~~However, t~~The high sensitivities obtained for both AHI cut-points  
4 support previous findings that the Berlin Questionnaire may have a role as a “rule-out”  
5 measurement in the primary care or screening setting(15, 17, 20, 24), though there have been  
6 some conflicting results, suggesting it does not have adequate discriminatory power.(16, 22)  
7  
8  
9

10  
11  
12  
13  
14 In our study Epworth Sleepiness Scale data indicated that two thirds of participants had  
15 excessive daytime somnolence (ESS  $\geq 11$ ), however scores were similar in individuals with or  
16 without SDB. Therefore, at least in the sleep clinic population, the ESS ~~does not have utility~~  
17 ~~in is not useful for~~ the prediction of SDB. ~~Nevertheless, it~~ may ~~be of value, be clinically~~  
18 ~~useful in other respects~~ perhaps ~~modified and/or~~ combined with other ~~structured~~  
19 ~~questionsmeasures~~, including those highlighted in this study, ~~in prediction of compliance~~  
20 with and benefit from OSA treatment ~~in patients with any degree of SDB~~. ~~Further research is~~  
21 ~~required to address this question.~~ Exhaled nitric oxide levels were not significantly different  
22 between individuals with or without SDB whether defined by an AHI cut-point of  $\geq 5$  or  $\geq 15$ .  
23  
24  
25  
26  
27  
28  
29  
30  
31  
32  
33  
34  
35  
36  
37  
38  
39  
40  
41  
42  
43  
44  
45  
46  
47  
48  
49  
50  
51  
52  
53  
54  
55  
56  
57  
58  
59  
60

43 We found that both the STOP and STOP-BANG questionnaires have utility in the prediction  
44 of SDB in the sleep clinic population, and that STOP-BANG was superior, with higher  
45 overall predictive accuracy. The STOP and STOP-BANG Questionnaires were developed  
46 and validated in a surgical population using in-laboratory polysomnography(23) and have  
47 subsequently been studied in a cardiovascular disease population.(25) Our results are in  
48 agreement with these two earlier studies as regards the increased predictive value of STOP-  
49 BANG over STOP. In contrast to these earlier studies, however, we found sensitivities to be

1  
2  
3 higher and specificities to be lower for both cut-points of AHI. ~~This is as expected given that~~  
4 ~~we were studying a symptomatic cohort referred to a sleep clinic, rather than a screening~~  
5 ~~population, and this is also a desirable outcome for these questionnaires in situations where~~  
6 ~~missing even mild OSA would be undesirable.~~ We suggest that of the two AHI cut-points,  
7 >15 events/hr is the more important, being diagnostic of at least moderate SDB and also an  
8 indication for CPAP treatment. At this cut-point, STOP and STOP-BANG performed with  
9 high sensitivities and negative predictive values (STOP-BANG superior to STOP) indicating  
10 that these questionnaires are more useful in excluding significant SDB. This is further  
11 corroborated by the negative likelihood ratios of <0.2 obtained for STOP and STOP-BANG  
12 that also indicate that these questionnaires are ~~likely~~ most useful ~~for in predicting low risk of~~  
13 ~~confirming ruling out~~ SDB. The STOP-BANG ~~:-these~~ may be of ~~future~~ value in ~~combination~~  
14 ~~in~~ the primary care setting, perhaps combined with type IV portable monitoring~~screening~~  
15 sleep studies, to determine requirement for sleep clinic review and more detailed polygraphy.

16  
17  
18  
19  
20  
21  
22  
23  
24  
25  
26  
27  
28  
29  
30  
31  
32  
33  
34 At the AHI cut-point of  $\geq 15$ , STOP-BANG had sensitivity and negative predictive value of  
35 100%, and since this is the standard cut-point conventionally used to determine need for  
36 CPAP,(28) we suggest that the STOP-BANG questionnaire is the preferred tool for prediction  
37 of SDB in the sleep clinic setting of those currently available. STOP-BANG, perhaps with  
38 modifications, ~~merits seems worthwhile for~~ further exploration evaluation for the prediction of  
39 sleep study findings~~SDB~~ in a larger the sleep clinic cohort population and, more importantly,  
40 its utility in prediction of clinical outcomes including treatment success ~~in symptomatic and~~  
41 ~~screening populations~~should be assessed.

42  
43  
44  
45  
46  
47  
48  
49  
50  
51  
52  
53  
54 The original STOP-BANG questionnaire uses a cut-point of  $\geq 3$  to predict SDB.(23)  
55  
56 However, in our study we show that different cut-points can be selected depending on the  
57  
58  
59  
60



1  
2  
3 preference to rule-in or rule-out SDB. A score of  $\geq 3$  had the highest overall accuracy and a  
4  
5 sensitivity of 0.93 for the AHI cut-point of  $\geq 5$ , whereas a score of  $\geq 6$  had the highest overall  
6  
7 accuracy and a specificity of 0.78 for the AHI cut-point of  $\geq 15$ . Two other studies have  
8  
9 examined the usefulness of different cut-points for STOP-BANG score.(33-34) In the obese,  
10  
11 a score of  $\geq 3$  was associated with a sensitivity of 0.90 for predicting an AHI  $>5$ , whilst, a  
12  
13 score of  $\geq 6$  had a specificity of 0.88 for predicting an AHI  $>15$  and similar results ~~were have~~  
14  
15 been obtained in the morbidly obese(33) and in ~~another~~ surgical population.(34) Thus, in the  
16  
17 sleep clinic setting where the ultimate goal is to identify patients requiring CPAP, a higher  
18  
19 cut-point for STOP-BANG may be preferred whereas in a primary care setting where the  
20  
21 priority is not to miss disease a lower cut-point may be chosen.  
22  
23  
24  
25

26  
27 The STOP-BANG questionnaire is, however, still an imperfect tool for prediction of results  
28  
29 on home polygraphy. Accordingly, the secondary objective of our study was to identify ~~those~~  
30  
31 variables for inclusion, ~~and how they should be weighted~~ in a locally developed composite  
32  
33 score for future validation in the sleep clinic and potentially wider population. Univariate  
34  
35 analysis showed several significant, expected associations for both cut-points of AHI. Using  
36  
37 multivariate analysis, neck circumference  $\geq 17$ in and the presence of witnessed apnoeas were  
38  
39 independent predictors of SDB. This is not a novel finding, but does support the robustness  
40  
41 of our data. Particularly when SDB was defined by an AHI cut-point of  $\geq 5$ , the regression  
42  
43 model derived indicated a high probability of SDB of 0.94 if both factors were present. The  
44  
45 STOP-BANG questionnaire, of course, includes both of these variables, and it is possible that  
46  
47 adjustment of the inclusion variables, or their weighting, might improve its performance. In  
48  
49 future work, we aim to validate a simple composite score based on these two variables in a  
50  
51 modification of ~~the STOP-BANG Questionnaire~~, to determine utility for predicting sleep  
52  
53 study data and outcomes with treatment.  
54  
55  
56  
57  
58  
59  
60



1  
2  
3  
4  
5 Ultimately, a predictive tool that can be utilised in primary care is the goal. Our results  
6 indicate low specificity of STOP-BANG, and therefore in its current form, if used in primary  
7 care to identify patients requiring referral for further assessment, it is likely to result in a  
8 significant percentage of patients being referred unnecessarily (false positives). It is hoped  
9 that a modified STOP-BANG with improved specificity, while not compromising sensitivity,  
10 may be developed that can be used safely in primary care for identification of patients  
11 requiring referral to sleep services. Of utmost importance too is the prediction of treatment  
12 outcome. Non-adherence to CPAP treatment occurs in between 46 and 83%.(35-36)  
13 Prediction of poor adherence by STOP-BANG or other similar tools would allow greater  
14 attention to interventions to improve adherence in patients more likely to default from  
15 treatment. The authors are not aware of any studies investigating this question and future  
16 research should explore this important issue.  
17  
18  
19  
20  
21  
22  
23  
24  
25  
26  
27  
28  
29  
30  
31  
32  
33

34 A possible limitation of our study was that SDB was characterised using home unattended  
35 limited sleep studies rather than in-hospital attended full polysomnography. The latter is  
36 considered the gold standard for diagnosis of SDB but is more expensive, less easily accessed  
37 and potentially unrepresentative with sleep in an unfamiliar environment. Home unattended  
38 and in-hospital attended sleep studies have previously been shown to produce similar results.  
39  
40 (37) Accordingly home testing with portable monitors is standard clinical practice in the UK,  
41 and is now considered an acceptable method for diagnosis of OSA by the American Academy  
42 of Sleep Medicine.(28) The sample size limits the conclusions that can be drawn from  
43 multivariate analysis, however this was a secondary objective of the current study. It is  
44 possible that variables predictive of SDB on univariate analysis in this cohort would have  
45 been identified as independently predictive in multivariate models in a larger population. The  
46  
47  
48  
49  
50  
51  
52  
53  
54  
55  
56  
57  
58  
59  
60

1  
2  
3 results of this study allow us, and potentially others, to focus future work to validate more  
4  
5 extensively the results obtained to date. We chose AHI cut-points of  $\geq 5$  and  $\geq 15$  to define  
6  
7 significant SDB. This was based on the consensus guideline produced by the Adult  
8  
9 Obstructive Sleep Apnea Task Force of the American Academy of Sleep Medicine that states  
10  
11 that diagnosis of OSA is based on a cut-point of  $>15$  events/hr or  $>5$  events/hr with relevant  
12  
13 symptoms, and that CPAP is indicated for treatment of moderate to severe OSA with  $\geq 15$   
14  
15 events/hr.(28) Although the cut-point of  $>30$  events/hr is consistent with severe OSA we  
16  
17 suggest that this cut-point is less clinically relevant from a diagnostic perspective or from that  
18  
19 of determining treatment. Finally, due to the prospective design of our study, we cannot  
20  
21 comment on the relative value of other tools developed for prediction of OSA such as the  
22  
23 Sleep Apnea Clinical Score (38) and American Society of Anesthesiologists Checklist. (39)  
24  
25 To compare their utility with that of the Berlin, STOP and STOP-BANG questionnaires in the  
26  
27 population referred to the sleep service would require a further study.  
28  
29  
30  
31  
32  
33

34 In conclusion, the Berlin Questionnaire was not useful in the prediction of SDB within our  
35  
36 sleep clinic population. The STOP-BANG questionnaire had superior predictive performance  
37  
38 to the STOP questionnaire at both cut-points of AHI ( $\geq 5$  and  $\geq 15$ ). A STOP-BANG score of  
39  
40  $\geq 3$  had the highest overall accuracy and a sensitivity of 0.93 for the prediction of an AHI $\geq 5$ ,  
41  
42 whilst a score of  $\geq 6$  had the highest overall accuracy and a specificity of 0.78 for the  
43  
44 prediction of an AHI  $\geq 15$ . Future work will validate a composite score including neck  
45  
46 circumference  $\geq 17$ in and the presence of witnessed apnoeas for the prediction of SDB in the  
47  
48 sleep clinic referral population. An optimised composite score could then be, with possibility  
49  
50 then of evaluating evaluated in primary care and against treatment outcomes, with our overall  
51  
52 aim being to provide required tools for use in the expanded and consolidated sleep services  
53  
54 that are now necessary; given the current obesity and OSA epidemics.  
55  
56  
57  
58  
59  
60

## References

1. Young T, Palta M, Dempsey J, et al. The occurrence of sleep-disordered breathing among middle-aged adults. *N Engl J Med*. 1993 ;**328**:1230-5.
2. Jordan AS, McSharry DG, Malhotra A. Adult obstructive sleep apnoea. *Lancet*. 2013; published online DOI:10.1016/S0140-6736(13)60734-5.
3. McNicholas WT. Diagnosis of obstructive sleep apnea in adults. *Proc Am Thorac Soc*. 2008;**5**:154-60.
4. Lacasse Y, Godbout C, Series F. Health-related quality of life in obstructive sleep apnoea. *Eur Respir J*. 2002;**19**:499-503.
5. Engleman HM, Douglas NJ. Sleep. 4: Sleepiness, cognitive function, and quality of life in obstructive sleep apnoea/hypopnoea syndrome. *Thorax*. 2004;**59**:618-22.
6. Teran-Santos J, Jimenez-Gomez A, Cordero-Guevara J. The association between sleep apnea and the risk of traffic accidents. Cooperative Group Burgos-Santander. *N Engl J Med*. 1999;**340**:847-51.
7. Robinson GV, Stradling JR, Davies RJ. Sleep . 6: obstructive sleep apnoea/hypopnoea syndrome and hypertension. *Thorax*. 2004;**59**:1089-94.
8. Lattimore JD, Celermajer DS, Wilcox I. Obstructive sleep apnea and cardiovascular disease. *J Am Coll Cardiol*. 2003;**41**:1429-37.
9. Svatikova A, Wolk R, Gami AS, et al. Interactions between obstructive sleep apnea and the metabolic syndrome. *Curr Diab Rep*. 2005;**5**:53-8.
10. Meslier N, Gagnadoux F, Giraud P, et al. Impaired glucose-insulin metabolism in males with obstructive sleep apnoea syndrome. *Eur Respir J*. 2003;**22**:156-60.
11. Young T, Evans L, Finn L, et al. Estimation of the clinically diagnosed proportion of sleep apnea syndrome in middle-aged men and women. *Sleep*. 1997;**20**:705-6.
12. Heffner JE, Rozenfeld Y, Kai M, et al. Prevalence of diagnosed sleep apnea among patients with type 2 diabetes in primary care. *Chest*. 2012;**141**:1414-21.
13. Wang Y, Lobstein T. Worldwide trends in childhood overweight and obesity. *Int J Pediatr Obes*. 2006;**1**:11-25.
14. Flegal KM, Carroll MD, Ogden CL, et al. Prevalence and trends in obesity among US adults, 1999-2000. *JAMA*. 2002;**288**:1723-7.
15. Netzer NC, Stoohs RA, Netzer CM, et al. Using the Berlin Questionnaire to identify patients at risk for the sleep apnea syndrome. *Ann Intern Med*. 1999;**131**:485-91.
16. Sert Kuniyoshi FH, Zellmer MR, Calvin AD, et al. Diagnostic accuracy of the Berlin Questionnaire in detecting sleep-disordered breathing in patients with a recent myocardial infarction. *Chest*. 2011;**140**:1192-7.
17. Best MW, Fitzpatrick M, Milev R, et al. Utility of the Berlin questionnaire for predicting obstructive sleep apnea in individuals with treatment-resistant depression. *Sleep Breath*. 2013; published online DOI:10.1007/s11325-013-0827-2.
18. Kang K, Park KS, Kim JE, et al. Usefulness of the Berlin Questionnaire to identify patients at high risk for obstructive sleep apnea: a population-based door-to-door study. *Sleep Breath*. 2013;**17**:803-10.
19. Ahmadi N, Chung SA, Gibbs A, et al. The Berlin questionnaire for sleep apnea in a sleep clinic population: relationship to polysomnographic measurement of respiratory disturbance. *Sleep Breath*. 2008;**12**:39-45.
20. Bouloukaki I, Komninos ID, Mermigkis C, et al. Translation and validation of Berlin questionnaire in primary health care in Greece. *BMC Pulm Med*. 2013;**13**:6.

21. Saleh AB, Ahmad MA, Awadalla NJ. Development of Arabic version of Berlin questionnaire to identify obstructive sleep apnea at risk patients. *Ann Thorac Med.* 2011 ;**6**:212-6.
22. Sforza E, Chouchou F, Pichot V, et al. Is the Berlin questionnaire a useful tool to diagnose obstructive sleep apnea in the elderly? *Sleep Med.* 2011;**12**:142-6.
23. Chung F, Yegneswaran B, Liao P, et al. STOP questionnaire: a tool to screen patients for obstructive sleep apnea. *Anesthesiology.* 2008 ;**108**:812-21.
24. Chung F, Yegneswaran B, Liao P, et al. Validation of the Berlin questionnaire and American Society of Anesthesiologists checklist as screening tools for obstructive sleep apnea in surgical patients. *Anesthesiology.* 2008 ;**108**:822-30.
25. Silva GE, Vana KD, Goodwin JL, et al. Identification of patients with sleep disordered breathing: comparing the four-variable screening tool, STOP, STOP-Bang, and Epworth Sleepiness Scales. *J Clin Sleep Med.* 2011;**7**:467-72.
26. Johns MW. A new method for measuring daytime sleepiness: the Epworth sleepiness scale. *Sleep.* 1991;**14**:540-5.
27. Sleep-related breathing disorders in adults: recommendations for syndrome definition and measurement techniques in clinical research. The Report of an American Academy of Sleep Medicine Task Force. *Sleep.* 1999;**22**:667-89.
28. Epstein LJ, Kristo D, Strollo PJ, et al. Clinical guideline for the evaluation, management and long-term care of obstructive sleep apnea in adults. *J Clin Sleep Med.* 2009;**5**:263-76.
29. Chua AP, Aboussouan LS, Minai OA, et al. Long-term continuous positive airway pressure therapy normalizes high exhaled nitric oxide levels in obstructive sleep apnea. *J Clin Sleep Med.* 2013;**9**:529-35.
30. Fortuna AM, Miralda R, Calaf N, et al. Airway and alveolar nitric oxide measurements in obstructive sleep apnea syndrome. *Respir Med.* 2011 ;**105**:630-6.
31. Depalo A, Carpagnano GE, Spanevello A, et al. Exhaled NO and iNOS expression in sputum cells of healthy, obese and OSA subjects. *J Intern Med.* 2008;**263**:70-8.
32. Agustí AG, Barbe F, Togo B. Exhaled nitric oxide in patients with sleep apnea. *Sleep.* 1999;**22**:231-5.
33. Chung F, Yang Y, Liao P. Predictive Performance of the STOP-Bang Score for Identifying Obstructive Sleep Apnea in Obese Patients. *Obes Surg.* 2013; published online DOI:10.1007/s11695-013-1006-z.
34. Chung F, Subramanyam R, Liao P, et al. High STOP-Bang score indicates a high probability of obstructive sleep apnoea. *Br J Anaesth.* 2012 ;**108**:768-75.
35. Weaver TE, Grunstein RR. Adherence to continuous positive airway pressure therapy: the challenge to effective treatment. *Proc Am Thorac Soc.* 2008;**5**:173-8.
36. Wolkove N, Baltzan M, Kamel H, et al. Long-term compliance with continuous positive airway pressure in patients with obstructive sleep apnea. *Can Respir J.* 2008;**15**:365-9.
37. Iber C, Redline S, Kaplan Gilpin AM, et al. Polysomnography performed in the unattended home versus the attended laboratory setting--Sleep Heart Health Study methodology. *Sleep.* 2004;**27**:536-40.
38. Flemons WW, Whitelaw WA, Brant R, et al. Likelihood ratios for a sleep apnea clinical prediction rule. *Am J Respir Crit Care Med.* 1994;**150**:1279-85.
39. Gross JB, Bachenberg KL, Benumof JL, et al. Practice guidelines for the perioperative management of patients with obstructive sleep apnea: a report by the American Society of Anesthesiologists Task Force on Perioperative Management of patients with obstructive sleep apnea. *Anesthesiology.* 2006 ;**104**:1081-93.

**Table 1:** Comparison of patient characteristics including anthropometric measurements, co-morbidities, symptoms, inflammatory markers, lipid profile and oximetry between groups without and with SDB as defined by AHI <5 events/hour and  $\geq 15$  events/hour.

|                                                          | <i>AHI&lt;5</i>      | <i>AHI<math>\geq</math>5</i> | <i>p</i>         | <i>AHI&lt;15</i>     | <i>AHI<math>\geq</math>15</i> | <i>P</i>         |
|----------------------------------------------------------|----------------------|------------------------------|------------------|----------------------|-------------------------------|------------------|
| <i>Male gender</i>                                       | <b>15/32 (47%)</b>   | <b>67/97 (69%)</b>           | <b>0.034</b>     | <b>38/73 (52%)</b>   | <b>44/56 (79%)</b>            | <b>0.003</b>     |
| <i>Age (yrs)</i>                                         | <b>44 (12)</b>       | <b>51 (11)</b>               | <b>0.004</b>     | 48 (13)              | 51 (9)                        | 0.103            |
| <i>Weight (kg)</i>                                       | <b>89 (19)</b>       | <b>101 (22)</b>              | <b>0.022</b>     | <b>92 (21)</b>       | <b>107 (20)</b>               | <b>0.001</b>     |
| <i>BMI (kg/m<sup>2</sup>)</i>                            | 31 (28-36)           | 33 (29-40)                   | 0.118            | <b>31 (27-36)</b>    | <b>34 (31-41)</b>             | <b>0.009</b>     |
| <i>Obesity (BMI<math>\geq</math>30 kg/m<sup>2</sup>)</i> | 18/28 (64%)          | 61/85 (72%)                  | 0.482            | <b>38/63 (60%)</b>   | <b>41/50 (82%)</b>            | <b>0.014</b>     |
| <i>Neck circumference (in)</i>                           | <b>15 (2)</b>        | <b>17(2)</b>                 | <b>&lt;0.001</b> | <b>16 (2)</b>        | <b>17 (1)</b>                 | <b>&lt;0.001</b> |
| <i>Neck circumference <math>\geq</math>17in</i>          | <b>4/22 (18%)</b>    | <b>45/76 (59%)</b>           | <b>0.001</b>     | <b>18/54 (33%)</b>   | <b>31/44 (70%)</b>            | <b>&lt;0.001</b> |
| <i>Mallampatti</i>                                       | 2 (1)                | 2 (1)                        | 0.192            | 2 (1)                | 2 (1)                         | 0.900            |
| <i>SBP (mmHg)</i>                                        | 134 (17)             | 136 (16)                     | 0.480            | 134 (15)             | 138 (18)                      | 0.194            |
| <i>DBP (mmHg)</i>                                        | 82 (11)              | 83 (9)                       | 0.528            | 81 (10)              | 85 (10)                       | 0.086            |
| <i>Diabetes</i>                                          | 2/32 (6%)            | 6/97 (6%)                    | 1.000            | 4/73 (5%)            | 4/56 (7%)                     | 0.727            |
| <i>Hypertension</i>                                      | 7/32 (22%)           | 36/97 (37%)                  | 0.134            | <b>18/73 (25%)</b>   | <b>25/56 (45%)</b>            | <b>0.024</b>     |
| <i>Hyperlipidaemia</i>                                   | 2/32 (6%)            | 18/97 (19%)                  | 0.156            | 10/73 (14%)          | 10/56 (18%)                   | 0.625            |
| <i>Loud snorer</i>                                       | 28/32 (88%)          | 92/97 (95%)                  | 0.224            | 65/73 (89%)          | 55/56 (98%)                   | 0.077            |
| <i>Witnessed apnoeas</i>                                 | <b>15/32 (47%)</b>   | <b>72/97 (74%)</b>           | <b>0.008</b>     | <b>40/73 (55%)</b>   | <b>47/56 (84%)</b>            | <b>&lt;0.001</b> |
| <i>Nocturia*</i>                                         | 11/32 (34%)          | 38/97 (39%)                  | 0.679            | 26/73 (36%)          | 23/56 (41%)                   | 0.585            |
| <i>Nocturnal wakenings*</i>                              | 18/32 (56%)          | 65/97 (67%)                  | 0.293            | 46/73 (63%)          | 37/56 (66%)                   | 0.853            |
| <i>Nocturnal choking</i>                                 | 15/32 (47%)          | 35/97 (36%)                  | 0.301            | 28/73 (38%)          | 22/56 (39%)                   | 1.000            |
| <i>Nocturnal gasping</i>                                 | 11/32 (34%)          | 38/97 (39%)                  | 0.679            | 26/73 (36%)          | 23/56 (41%)                   | 0.585            |
| <i>F<sub>e</sub>NO (ppb)</i>                             | 15 (12-25)           | 18 (12-26)                   | 0.595            | 15 (11-24)           | 19 (12-27)                    | 0.050            |
| <i>Cholesterol (mmol/L)</i>                              | 5.2 (1.1)            | 5.4 (1.0)                    | 0.431            | 5.3 (1.1)            | 5.4 (0.9)                     | 0.674            |
| <i>HDL cholesterol (mmol/L)</i>                          | <b>1.3 (1.0-1.5)</b> | <b>1.1 (1.0-1.3)</b>         | <b>0.008</b>     | <b>1.2 (1.0-1.4)</b> | <b>1.1 (1.0-1.2)</b>          | <b>0.016</b>     |
| <i>Triglycerides (mmol/L)</i>                            | <b>1.9 (1.0-2.5)</b> | <b>2.2 (1.5-3.2)</b>         | <b>0.015</b>     | <b>1.9 (1.3-2.9)</b> | <b>2.3 (1.6-3.2)</b>          | <b>0.042</b>     |
| <i>Cholesterol/HDL</i>                                   | <b>4.1 (3.3-5.0)</b> | <b>4.7 (3.8-5.7)</b>         | <b>0.011</b>     | <b>4.3 (3.5-5.6)</b> | <b>4.8 (4.0-5.8)</b>          | <b>0.022</b>     |
| <i>HbA1c (mmol/mol)</i>                                  | <b>34 (32-37)</b>    | <b>38 (36-41)</b>            | <b>0.001</b>     | <b>36 (33-39)</b>    | <b>38 (36-42)</b>             | <b>0.002</b>     |
| <i>CRP</i>                                               | 3.0 (1.2-8.5)        | 3.8 (1.4-7.5)                | 0.608            | 3.0 (1.3-7.6)        | 4.3 (1.4-8.6)                 | 0.173            |

Legend for Table 1: Data presented as mean (standard deviation), median (interquartile

range) or proportion (percentage) as appropriate. Significant differences in bold. \*  $\geq 2$ /night.

Abbreviations: BMI, body mass index; SBP, systolic blood pressure; DBP, diastolic blood pressure; F<sub>e</sub>NO, fraction of exhaled nitric oxide; HDL, high density lipoprotein; HbA1c, glycated haemoglobin; CRP, C-reactive protein; ODI, oxygen desaturation index; SpO<sub>2</sub>, oxygen saturation; SpO<sub>2</sub> t<90, duration of time for which oxygen saturation less than 90%.

**Table 2:** Comparison of results of Epworth Sleepiness Scale (ESS) and Berlin, STOP and STOP-BANG Questionnaires between groups without and with SDB as defined by AHI <5 events/hour and  $\geq 15$  events/hour.

|                                              | <i>AHI</i> <5      | <i>AHI</i> $\geq$ 5 | <i>p</i>         | <i>AHI</i> <15     | <i>AHI</i> $\geq$ 15 | <i>p</i>         |
|----------------------------------------------|--------------------|---------------------|------------------|--------------------|----------------------|------------------|
| <i>ESS score</i>                             | 13 (8-16)          | 13 (7-17)           | 0.845            | 13 (7-16)          | 13 (9-18)            | 0.476            |
| <i>ESS +ve (<math>\geq 11/24</math>)</i>     | 17/28 (61%)        | 63/92 (68%)         | 0.496            | 42/66 (64%)        | 38/54 (70%)          | 0.560            |
| <i>Berlin +ve</i>                            | 29/31 (94%)        | 87/94 (93%)         | 1.000            | 65/71 (92%)        | 51/54 (94%)          | 0.731            |
| <i>STOP score</i>                            | <b>2.5 (2-3)</b>   | <b>3 (2-3)</b>      | <b>0.011</b>     | <b>3 (2-3)</b>     | <b>3 (3-3.5)</b>     | <b>&lt;0.001</b> |
| <i>STOP +ve (<math>\geq 2/4</math>)</i>      | <b>27/32 (84%)</b> | <b>93/96 (97%)</b>  | <b>0.023</b>     | 66/73 (90%)        | 54/55 (98%)          | 0.137            |
| <i>STOP-BANG score</i>                       | <b>4 (2-5)</b>     | <b>5 (5-6)</b>      | <b>&lt;0.001</b> | <b>5 (2-5)</b>     | <b>6 (5-6)</b>       | <b>&lt;0.001</b> |
| <i>STOP-BANG +ve (<math>\geq 3/8</math>)</i> | <b>21/30 (70%)</b> | <b>88/93 (95%)</b>  | <b>&lt;0.001</b> | <b>54/68 (79%)</b> | <b>55/55 (100%)</b>  | <b>&lt;0.001</b> |

Legend for Table 2: Data presented as median (interquartile range) or proportion (percentage)

as appropriate. Significant differences in bold.

**Table 3:** Sensitivities, specificities, positive predictive values (PPV), negative predictive values (NPV), likelihood ratios positive (LR+), likelihood ratios negative (LR-), and overall accuracies of the Berlin, STOP and STOP-BANG Questionnaires for prediction of significant SDB as defined by: A: AHI  $\geq$ 5 events/hour; B: AHI  $\geq$ 15 events/hour.

A: Cut-point = AHI  $\geq$ 5 events/hour

|                  | <i>Sensitivity</i>  | <i>Specificity</i>  | <i>PPV</i>          | <i>NPV</i>          | <i>LR+</i> | <i>LR-</i> | <i>Accuracy</i> |
|------------------|---------------------|---------------------|---------------------|---------------------|------------|------------|-----------------|
| <i>Berlin</i>    | 0.93<br>(0.85-0.97) | 0.06<br>(0.01-0.21) | 0.75<br>(0.66-0.83) | 0.22<br>(0.03-0.60) | 0.99       | 1.15       | 71%             |
| <i>STOP</i>      | 0.97<br>(0.91-0.99) | 0.16<br>(0.05-0.33) | 0.78<br>(0.69-0.85) | 0.62<br>(0.24-0.91) | 1.15       | 0.20       | 77%             |
| <i>STOP-BANG</i> | 0.95<br>(0.88-0.98) | 0.30<br>(0.15-0.49) | 0.81<br>(0.72-0.88) | 0.64<br>(0.35-0.87) | 1.35       | 0.18       | 79%             |

B: Cut-point = AHI  $\geq$ 15 events/hour

|                  | <i>Sensitivity</i>  | <i>Specificity</i>  | <i>PPV</i>          | <i>NPV</i>          | <i>LR+</i> | <i>LR-</i> | <i>Accuracy</i> |
|------------------|---------------------|---------------------|---------------------|---------------------|------------|------------|-----------------|
| <i>Berlin</i>    | 0.94<br>(0.85-0.99) | 0.08<br>(0.03-0.17) | 0.44<br>(0.35-0.53) | 0.67<br>(0.30-0.92) | 1.03       | 0.66       | 46%             |
| <i>STOP</i>      | 0.98<br>(0.90-1.00) | 0.10<br>(0.04-0.19) | 0.45<br>(0.36-0.54) | 0.88<br>(0.47-1.00) | 1.09       | 0.19       | 48%             |
| <i>STOP-BANG</i> | 1.00<br>(0.94-1.00) | 0.21<br>(0.12-0.32) | 0.50<br>(0.41-0.60) | 1.00<br>(0.77-1.00) | 1.26       | 0.00       | 56%             |

Legend for Table 3: Data presented with 95% confidence intervals.



**Table 4:** Sensitivities, specificities, positive predictive values (PPV), negative predictive values (NPV), likelihood ratios positive (LR+), likelihood ratios negative (LR-), and overall accuracies of different cut-points of the STOP-BANG questionnaire for prediction of significant SDB as defined by: A: AHI  $\geq 5$  events/hour; B: AHI  $\geq 15$  events/hour.

A: Cut-point = AHI  $\geq 5$  events/hour

| <i>STOP-BANG cut-point (/8)</i> | <i>Proportion +ve SB</i> | <i>Sensitivity</i>  | <i>Specificity</i>  | <i>PPV</i>          | <i>NPV</i>          | <i>LR+</i> | <i>LR-</i> | <i>Accuracy</i> |
|---------------------------------|--------------------------|---------------------|---------------------|---------------------|---------------------|------------|------------|-----------------|
| $\geq 2$                        | 92/96                    | 0.99<br>(0.92-1.00) | 0.12<br>(0.03-0.32) | 0.77<br>(0.67-0.85) | 0.75<br>(0.19-0.99) | 1.13       | 0.11       | 77%             |
| $\geq 3$                        | 82/96                    | 0.93<br>(0.84-0.98) | 0.38<br>(0.19-0.59) | 0.82<br>(0.72-0.89) | 0.64<br>(0.35-0.87) | 1.49       | 0.18       | 79%             |
| $\geq 4$                        | 79/96                    | 0.90<br>(0.81-0.96) | 0.42<br>(0.22-0.63) | 0.82<br>(0.72-0.90) | 0.59<br>(0.33-0.82) | 1.55       | 0.23       | 78%             |
| $\geq 5$                        | 67/96                    | 0.81<br>(0.70-0.89) | 0.62<br>(0.41-0.81) | 0.87<br>(0.76-0.94) | 0.52<br>(0.32-0.71) | 2.15       | 0.31       | 76%             |
| $\geq 6$                        | 38/96                    | 0.46<br>(0.34-0.58) | 0.79<br>(0.58-0.93) | 0.87<br>(0.72-0.96) | 0.33<br>(0.21-0.46) | 2.20       | 0.68       | 54%             |
| $\geq 7$                        | 15/96                    | 0.18<br>(0.10-0.29) | 0.92<br>(0.73-0.99) | 0.87<br>(0.60-0.98) | 0.27<br>(0.18-0.38) | 2.17       | 0.89       | 36%             |
| 8                               | 5/96                     | 0.07<br>(0.02-0.15) | 1.00<br>(0.86-1.00) | 1.00<br>(0.48-1.00) | 0.26<br>(0.18-0.37) | -          | 0.93       | 30%             |

B: Cut-point = AHI  $\geq 15$  events/hour

| <i>STOP-BANG cut-point (/8)</i> | <i>Proportion +ve SB</i> | <i>Sensitivity</i>  | <i>Specificity</i>  | <i>PPV</i>          | <i>NPV</i>          | <i>LR+</i> | <i>LR-</i> | <i>Accuracy</i> |
|---------------------------------|--------------------------|---------------------|---------------------|---------------------|---------------------|------------|------------|-----------------|
| $\geq 2$                        | 92/96                    | 1.00<br>(0.91-1.00) | 0.07<br>(0.02-0.18) | 0.45<br>(0.34-0.55) | 1.00<br>(0.40-1.00) | 1.08       | 0          | 47%             |
| $\geq 3$                        | 82/96                    | 1.00<br>(0.91-1.00) | 0.25<br>(0.15-0.39) | 0.50<br>(0.39-0.61) | 1.00<br>(0.77-1.00) | 1.34       | 0          | 57%             |
| $\geq 4$                        | 79/96                    | 1.00<br>(0.91-1.00) | 0.31<br>(0.19-0.45) | 0.52<br>(0.40-0.63) | 1.00<br>(0.80-1.00) | 1.45       | 0          | 60%             |
| $\geq 5$                        | 67/96                    | 0.93<br>(0.80-0.98) | 0.47<br>(0.34-0.61) | 0.57<br>(0.44-0.69) | 0.90<br>(0.73-0.98) | 1.76       | 0.15       | 67%             |
| $\geq 6$                        | 38/96                    | 0.63<br>(0.47-0.78) | 0.78<br>(0.65-0.88) | 0.68<br>(0.51-0.82) | 0.74<br>(0.61-0.85) | 2.91       | 0.47       | 72%             |
| $\geq 7$                        | 15/96                    | 0.22<br>(0.11-0.38) | 0.89<br>(0.78-0.96) | 0.60<br>(0.32-0.84) | 0.60<br>(0.49-0.71) | 2.01       | 0.88       | 60%             |
| 8                               | 5/96                     | 0.10<br>(0.03-0.23) | 0.98<br>(0.90-1.00) | 0.80<br>(0.28-0.99) | 0.59<br>(0.48-0.70) | 5.36       | 0.92       | 60%             |

Legend for Table 4: Data presented with 95% confidence intervals. Abbreviations: SB,

STOP-BANG.



**Table 5:** Probabilities of SDB using a composite score based on neck circumference ( $\geq 17$ in or  $< 17$ in) and presence (1) or absence (0) of witnessed apnoeas derived from logistic regression models. SDB defined by: A: AHI  $\geq 5$  events/hour; B: AHI  $\geq 15$  events/hour.

A: Cut-point = AHI  $\geq 5$  events/hour

| <i>Neck Circumference (in)</i> | <i>Witnessed Apnoeas</i> |          |
|--------------------------------|--------------------------|----------|
|                                | <i>0</i>                 | <i>1</i> |
| <i>&lt;17</i>                  | 0.47                     | 0.75     |
| <i><math>\geq 17</math></i>    | 0.83                     | 0.94     |

B: Cut-point = AHI  $\geq 15$  events/hour

| <i>Neck Circumference (in)</i> | <i>Witnessed Apnoeas</i> |          |
|--------------------------------|--------------------------|----------|
|                                | <i>0</i>                 | <i>1</i> |
| <i>&lt;17</i>                  | 0.17                     | 0.40     |
| <i><math>\geq 17</math></i>    | 0.40                     | 0.69     |

**Table 6:** Sensitivities, specificities, positive predictive values (PPV), negative predictive values (NPV), and overall accuracies of logistic models for prediction of SDB as defined by:

A: AHI  $\geq 5$  events/hour; predict SDB *unless* neck  $< 17$ in *and* witnessed apnoeas absent; B:

AHI  $\geq 15$  events/hour; predict SDB *only if* neck  $\geq 17$ in *and* witnessed apnoeas present.

| <i>Model</i> | <i>Sensitivity</i>  | <i>Specificity</i>  | <i>PPV</i>          | <i>NPV</i>          | <i>Accuracy</i> |
|--------------|---------------------|---------------------|---------------------|---------------------|-----------------|
| A            | 0.84<br>(0.75-0.91) | 0.54<br>(0.34-0.72) | 0.85<br>(0.76-0.92) | 0.52<br>(0.32-0.71) | 77%             |
| B            | 0.56<br>(0.41-0.70) | 0.80<br>(0.68-0.89) | 0.69<br>(0.53-0.82) | 0.69<br>(0.57-0.79) | 69%             |

Legend for Table 6: Data presented with 95% confidence intervals.

**Figure 1:** ROC curves of logistic models for prediction of SDB as defined by: **Model A:** AHI  $\geq 5$  events/hour; predict SDB *unless* neck  $< 17$  in and witnessed apnoeas absent; **Model B:** AHI  $\geq 15$  events/hour; predict SDB *only if* neck  $\geq 17$  in and witnessed apnoeas present.

**Model A:**

**Model B:**

### **Contributorship Statement:**

Douglas Cowan took a leading role in study protocol development, study document development, application for ethics approval, data collection, statistical analysis and paper writing.

Gwen Allardice provided statistical support and performed part of the statistical analysis.

Duncan MacFarlane, Darren Ramsay and Heather Ambler contributed to data collection, and carried out and scored sleep studies.

Stephen Banham contributed to study protocol development.

Eric Livingston contributed to study protocol development, study document development, application for ethics approval and paper writing.

Christopher Carlin contributed to study protocol development, data collection, statistical analysis and paper writing.

All authors approved the final draft before submission.

Christopher Carlin is responsible for the overall content as guarantor.

1  
2  
3  
4  
5  
6  
7  
8  
9  
10  
11  
12  
13  
14  
15  
16  
17  
18  
19  
20  
21  
22  
23  
24  
25  
26  
27  
28  
29  
30  
31  
32  
33  
34  
35  
36  
37  
38  
39  
40  
41  
42  
43  
44  
45  
46  
47  
48  
49  
50  
51  
52  
53  
54  
55  
56  
57  
58  
59  
60

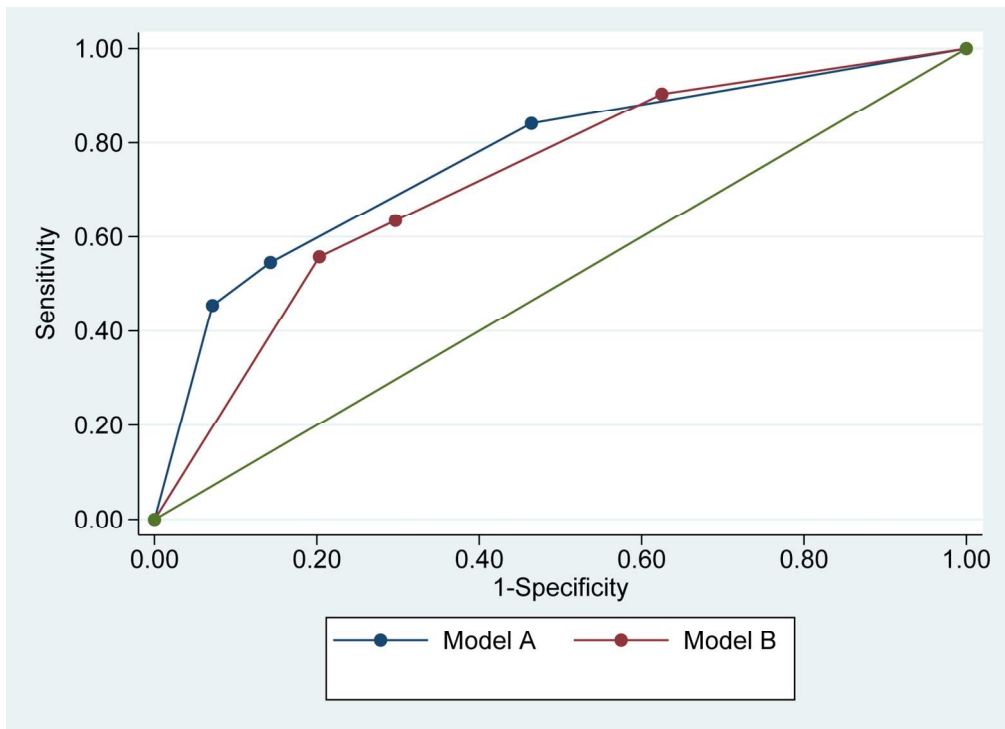

139x101mm (300 x 300 DPI)

View only

## STROBE Statement—checklist of items that should be included in reports of observational studies

|                              | Item No | Recommendation                                                                                                                                                                                                                                                                                                                                                                                                                                                         | Page |
|------------------------------|---------|------------------------------------------------------------------------------------------------------------------------------------------------------------------------------------------------------------------------------------------------------------------------------------------------------------------------------------------------------------------------------------------------------------------------------------------------------------------------|------|
| Title and abstract           | 1       | (a) Indicate the study's design with a commonly used term in the title or the abstract                                                                                                                                                                                                                                                                                                                                                                                 | 1    |
|                              |         | (b) Provide in the abstract an informative and balanced summary of what was done and what was found                                                                                                                                                                                                                                                                                                                                                                    | 3    |
| <b>Introduction</b>          |         |                                                                                                                                                                                                                                                                                                                                                                                                                                                                        |      |
| Background/rationale         | 2       | Explain the scientific background and rationale for the investigation being reported                                                                                                                                                                                                                                                                                                                                                                                   | 5    |
| Objectives                   | 3       | State specific objectives, including any prespecified hypotheses                                                                                                                                                                                                                                                                                                                                                                                                       | 6    |
| <b>Methods</b>               |         |                                                                                                                                                                                                                                                                                                                                                                                                                                                                        |      |
| Study design                 | 4       | Present key elements of study design early in the paper                                                                                                                                                                                                                                                                                                                                                                                                                | 6    |
| Setting                      | 5       | Describe the setting, locations, and relevant dates, including periods of recruitment, exposure, follow-up, and data collection                                                                                                                                                                                                                                                                                                                                        | 6    |
| Participants                 | 6       | (a) <i>Cohort study</i> —Give the eligibility criteria, and the sources and methods of selection of participants. Describe methods of follow-up<br><i>Case-control study</i> —Give the eligibility criteria, and the sources and methods of case ascertainment and control selection. Give the rationale for the choice of cases and controls<br><i>Cross-sectional study</i> —Give the eligibility criteria, and the sources and methods of selection of participants | 6    |
|                              |         | (b) <i>Cohort study</i> —For matched studies, give matching criteria and number of exposed and unexposed<br><i>Case-control study</i> —For matched studies, give matching criteria and the number of controls per case                                                                                                                                                                                                                                                 |      |
| Variables                    | 7       | Clearly define all outcomes, exposures, predictors, potential confounders, and effect modifiers. Give diagnostic criteria, if applicable                                                                                                                                                                                                                                                                                                                               | 7    |
| Data sources/<br>measurement | 8*      | For each variable of interest, give sources of data and details of methods of assessment (measurement). Describe comparability of assessment methods if there is more than one group                                                                                                                                                                                                                                                                                   | 7    |
| Bias                         | 9       | Describe any efforts to address potential sources of bias                                                                                                                                                                                                                                                                                                                                                                                                              | NA   |
| Study size                   | 10      | Explain how the study size was arrived at                                                                                                                                                                                                                                                                                                                                                                                                                              | NA   |
| Quantitative variables       | 11      | Explain how quantitative variables were handled in the analyses. If applicable, describe which groupings were chosen and why                                                                                                                                                                                                                                                                                                                                           | 8    |
| Statistical methods          | 12      | (a) Describe all statistical methods, including those used to control for confounding                                                                                                                                                                                                                                                                                                                                                                                  | 8    |
|                              |         | (b) Describe any methods used to examine subgroups and interactions                                                                                                                                                                                                                                                                                                                                                                                                    | 8    |
|                              |         | (c) Explain how missing data were addressed                                                                                                                                                                                                                                                                                                                                                                                                                            | 8    |
|                              |         | (d) <i>Cohort study</i> —If applicable, explain how loss to follow-up was addressed<br><i>Case-control study</i> —If applicable, explain how matching of cases and controls was addressed<br><i>Cross-sectional study</i> —If applicable, describe analytical methods taking account of sampling strategy                                                                                                                                                              | NA   |
|                              |         | (e) Describe any sensitivity analyses                                                                                                                                                                                                                                                                                                                                                                                                                                  |      |

| <b>Results</b>           |     | <b>Page</b>                                                                                                                                                                                                  |            |
|--------------------------|-----|--------------------------------------------------------------------------------------------------------------------------------------------------------------------------------------------------------------|------------|
| Participants             | 13* | (a) Report numbers of individuals at each stage of study—eg numbers potentially eligible, examined for eligibility, confirmed eligible, included in the study, completing follow-up, and analysed            | 9          |
|                          |     | (b) Give reasons for non-participation at each stage                                                                                                                                                         | NA         |
|                          |     | (c) Consider use of a flow diagram                                                                                                                                                                           | NA         |
| Descriptive data         | 14* | (a) Give characteristics of study participants (eg demographic, clinical, social) and information on exposures and potential confounders                                                                     | 9,18       |
|                          |     | (b) Indicate number of participants with missing data for each variable of interest                                                                                                                          | 19         |
|                          |     | (c) <i>Cohort study</i> —Summarise follow-up time (eg, average and total amount)                                                                                                                             | NA         |
| Outcome data             | 15* | <i>Cohort study</i> —Report numbers of outcome events or summary measures over time                                                                                                                          | NA         |
|                          |     | <i>Case-control study</i> —Report numbers in each exposure category, or summary measures of exposure                                                                                                         | NA         |
|                          |     | <i>Cross-sectional study</i> —Report numbers of outcome events or summary measures                                                                                                                           | 9,10,19-23 |
| Main results             | 16  | (a) Give unadjusted estimates and, if applicable, confounder-adjusted estimates and their precision (eg, 95% confidence interval). Make clear which confounders were adjusted for and why they were included | 20-21      |
|                          |     | (b) Report category boundaries when continuous variables were categorized                                                                                                                                    | NA         |
|                          |     | (c) If relevant, consider translating estimates of relative risk into absolute risk for a meaningful time period                                                                                             | NA         |
| Other analyses           | 17  | Report other analyses done—eg analyses of subgroups and interactions, and sensitivity analyses                                                                                                               | 10,22-23   |
| <b>Discussion</b>        |     |                                                                                                                                                                                                              |            |
| Key results              | 18  | Summarise key results with reference to study objectives                                                                                                                                                     | 11         |
| Limitations              | 19  | Discuss limitations of the study, taking into account sources of potential bias or imprecision. Discuss both direction and magnitude of any potential bias                                                   | 14-15      |
| Interpretation           | 20  | Give a cautious overall interpretation of results considering objectives, limitations, multiplicity of analyses, results from similar studies, and other relevant evidence                                   | 11-14      |
| Generalisability         | 21  | Discuss the generalisability (external validity) of the study results                                                                                                                                        | 14         |
| <b>Other information</b> |     |                                                                                                                                                                                                              |            |
| Funding                  | 22  | Give the source of funding and the role of the funders for the present study and, if applicable, for the original study on which the present article is based                                                | NA         |

\*Give information separately for cases and controls in case-control studies and, if applicable, for exposed and unexposed groups in cohort and cross-sectional studies.

**Note:** An Explanation and Elaboration article discusses each checklist item and gives methodological background and published examples of transparent reporting. The STROBE checklist is best used in conjunction with this article (freely available on the Web sites of PLoS Medicine at <http://www.plosmedicine.org/>, Annals of Internal Medicine at <http://www.annals.org/>, and Epidemiology at <http://www.epidem.com/>). Information on the STROBE Initiative is available at [www.strobe-statement.org](http://www.strobe-statement.org).
